# Supplementary material for: Machine Learning Enables Accurate and Rapid Prediction of Active Molecules Against Breast Cancer Cells
Source: Front Pharmacol. 2021 Dec 17;12:796534. doi: 10.3389/fphar.2021.796534 (PMC8719637; doi:10.3389/fphar.2021.796534)
Supplement: Supplementary file 2 [file DataSheet2.xlsx]

## Sheet: Table S1
Table S1. Summary of hyperparameter setting in different models.
Methods Datasets	Hyperparameters																		Methods	Hyperparameters
	DNN::RDKitDes	DNN::AtomPairs	DNN::MACCS	DNN::Morgan	DNN::PharmacoPFP		KNN::RDKitDes	KNN::AtomPairs	KNN::MACCS	KNN::Morgan	KNN::PharmacoPFP		NB::RDKitDes	NB::AtomPairs	NB::MACCS	NB::Morgan	NB::PharmacoPFP
Bcap37	0.5, [64], 0.01	defaulta	defaulta	0.5, [512], 0.001	defaulta		defaultb	4, 1, 'distance'	5, 1, 'distance'	2, 2, 'distance'	2, 2, 'distance'		defaultc	defaultc	0.01, 0.8	defaultc	defaultc
BT-20	0.5, [128], 0.001	0.5, [128], 0.0001	defaulta	0.1, [512], 0.0001	defaulta		5, 2, 'uniform'	5, 2, 'distance'	4, 1, 'distance'	defaultb	defaultb		0.01, 0	defaultc	0.01, 0.8	defaultc	defaultc
BT-474	defaulta	0.5, [64], 0.0001	0.2, [512], 0.001	defaulta	0.1, [512], 0.0001		defaultb	4, 1, 'distance'	defaultb	defaultb	5, 2, 'distance'		defaultc	defaultc	defaultc	0.1, 0.8	defaultc
BT-549	defaulta	defaulta	0.1, [512], 0.0001	0.5, [512], 0.01	0.5, [64], 0.0001		3, 2, 'distance'	3, 2, 'distance'	4, 1, 'distance'	5, 1, 'distance'	defaultb		0.01, 0	0.01, 0.8	defaultc	0.01, 0.8	defaultc
HBL-100	defaulta	0.1, [512], 0.01	defaulta	0.5, [256], 0.001	defaulta		defaultb	defaultb	defaultb	4, 2, 'distance'	3, 2, 'uniform'		defaultc	0.01, 0.8	0.01, 0.8	0.01, 0.8	defaultc		DNN	'dropouts':[0.1,0.2,0.5],
HS-578T	defaulta	defaulta	defaulta	0.5, [128], 0.0001	defaulta		defaultb	defaultb	5, 1, 'distance'	5, 1, 'distance'	4, 2, 'distance'		defaultc	defaultc	0.01, 0.8	0.1, 0.8	defaultc			'layer_sizes':[[64],[128],[256],[512]],
MCF-7	0.5, [128], 0.0001	0.2,[256],0.0001	0.2, [256], 0.0001	0.5, [512], 0.0001	0.2,[128],0.0001		5, 1, 'distance'	5, 1, 'distance'	5, 2, 'uniform'	5, 1, 'distance'	5, 1, 'distance'		defaultc	0.01, 0.8	0.01, 0.8	0.01, 0.8	defaultc			'weight_decay_penalty':[0.01,0.001,0.0001]
MDA-MB-231	0.5,[64],0.0001	0.2,[64],0.001	0.5,[256],0.0001	0.5,[64],0.001	0.2,[128],0.0001		5, 1, 'distance'	5, 1, 'distance'	5, 2, 'uniform'	5, 1, 'distance'	5, 1, 'distance'		defaultc	0.1, 0.8	0.01, 0.8	0.1, 0.8	defaultc		KNN	'n_neighbors':[1,2,3,4,5],
MDA-MB-361	defaulta	0.5, [128], 0.01	0.2, [512], 0.001	0.1, [64], 0.0001	defaulta		defaultb	4, 1, 'uniform'	defaultb	5, 2, 'distance'	defaultb		defaultc	defaultc	defaultc	defaultc	defaultc			'p':[1,2],
MDA-MB-435	defaulta	0.2, [256], 0.001	0.1, [128], 0.0001	0.5, [256], 0.0001	defaulta		5, 2, 'distance'	5, 1, 'distance'	5, 2, 'uniform'	5, 1, 'distance'	4, 2, 'uniform'		defaultc	defaultc	defaultc	defaultc	defaultc			'weights':['uniform','distance']
MDA-MB-453	defaulta	defaulta	0.2, [512], 0.001	defaulta	0.5, [64], 0.001		defaultb	defaultb	defaultb	5, 2, 'uniform'	defaultb		defaultc	defaultc	0.01, 0.8	defaultc	0.01, 0.8		NB	'alpha':[1,0.1,0.01],
MDA-MB-468	defaulta	defaulta	0.5, [128], 0.001	defaulta	0.5, [64], 0.01		4, 1, 'distance'	defaultb	5, 1, 'distance'	5, 2, 'distance'	defaultb		0.01, 0	defaultc	defaultc	defaultc	defaultc			'binarize':[0,0.5,0.8]
SK-BR-3	0.1, [128], 0.001	defaulta	0.2, [256], 0.001	0.1, [512], 0.0001	defaulta		defaultb	5, 2, 'uniform'	4, 2, 'distance'	5, 2, 'distance'	defaultb		0.1, 0	0.01, 0.8	0.01, 0.8	0.1, 0.8	defaultc		RF	'n_estimators':[10, 50, 100, 200, 300, 400, 500],
T-47D	defaulta	defaulta	defaulta	0.5,[128],0.01	0.5,[256],0.01		5, 1, 'distance'	5, 1, 'distance'	defaultb	4, 1, 'distance'	5, 1, 'distance'		defaultc	0.01, 0.8	0.1, 0.8	0.1, 0.8	defaultc			'criterion':["gini", "entropy"],
																				'max_depth': [None,5,10,15],
	RF::RDKitDes	RF::AtomPairs	RF::MACCS	RF::Morgan	RF::PharmacoPFP		SVM::RDKitDes	SVM::AtomPairs	SVM::MACCS	SVM::Morgan	SVM::PharmacoPFP		XGBoost::RDKitDes	XGBoost::AtomPairs	XGBoost::MACCS	XGBoost::Morgan	XGBoost::PharmacoPFP			'min_samples_leaf': [1,3,5,10],
Bcap37	100, 'entropy', 15, 1, 'sqrt'	defaultd	10, 'gini', 10, 1, 'log2'	10, 'entropy', 5, 1, 'auto'	defaultd		0.1, 100	'auto', 100	0.2, 100	0.1, 100	0.2, 100		0.1, 0.1, 1, 3, 50, 0.8, 1.0	defaultf	defaultf	defaultf	defaultf			'max_features':["log2","auto","sqrt"]
BT-20	10, 'gini', 10, 1, 'sqrt'	defaultd	defaultd	10, 'entropy', 10, 1, 'log2'	defaultd		defaulte	defaulte	defaulte	defaulte	defaulte		0.1, 0, 1, 5, 100, 0.8, 1.0	defaultf	defaultf	defaultf	defaultf		SVM	'gamma':['auto',0.1,0.2],
BT-474	defaultd	defaultd	100, 'entropy', 15, 1, 'auto'	defaultd	100, 'entropy', 10, 1, 'log2'		defaulte	defaulte	'auto', 10	'auto', 100	defaulte		defaultf	0.1, 0.1, 3, 3, 100, 0.8, 1.0	defaultf	defaultf	defaultf			'C': [1, 10, 100]
BT-549	100, 'entropy', 15, 1, 'log2'	200, 'gini', None, 1, 'sqrt'	defaultd	defaultd	defaultd		0.2, 100	defaulte	defaulte	defaulte	defaulte		defaultf	defaultf	0.1, 0.1, 1, 5, 100, 0.8, 1.0	defaultf	defaultf		XGBoost	'learning_rate':[0.01,0.1],
HBL-100	defaultd	10, 'gini', None, 5, 'auto'	defaultd	defaultd	defaultd		defaulte	'auto', 100	defaulte	0.1, 100	defaulte		defaultf	defaultf	defaultf	defaultf	defaultf			'gamma':[0,0.1],
HS-578T	10, 'entropy', 10, 5, 'sqrt'	defaultd	10, 'gini', 15, 1, 'sqrt'	defaultd	100, 'gini', 15, 1, 'auto'		0.2, 100	'auto', 100	defaulte	defaulte	defaulte		defaultf	defaultf	0.1, 0, 1, 5, 50, 0.8, 0.8	0.1, 0.1, 1, 5, 50, 0.8, 0.8	0.1, 0, 1, 3, 100, 0.8, 0.8			'min_child_weight':[1,3],
MCF-7	300, 'entropy', None, 3, 'auto'	500, 'entropy', None, 1, 'sqrt'	500, 'entropy', None, 3, 'auto'	400, 'entropy', None, 1, 'sqrt'	defaultd		defaulte	'auto', 10	0.2, 1	0.1, 1	0.1, 1		defaultf	defaultf	defaultf	defaultf	defaultf			'max_depth':[3,5],
MDA-MB-231	500, 'entropy', None, 3, 'auto'	defaultd	defaultd	defaultd	defaultd		defaulte	'auto', 10	0.1, 1	0.1, 100	0.1, 10		0.1, 0, 1, 5, 100, 0.8, 1.0	defaultf	defaultf	defaultf	defaultf			'n_estimators':[50,100],
MDA-MB-361	defaultd	10, 'gini', None, 5, 'log2'	defaultd	defaultd	defaultd		0.2, 10	defaulte	defaulte	'auto', 10	defaulte		0.1, 0.1, 3, 5, 50, 1.0, 1.0	defaultf	defaultf	defaultf	defaultf			'subsample':[0.8,1.0],
MDA-MB-435	200, 'entropy', None, 1, 'log2'	defaultd	defaultd	defaultd	defaultd		defaulte	defaulte	0.1, 100	defaulte	defaulte		defaultf	defaultf	defaultf	defaultf	0.1, 0, 1, 5, 100, 0.8, 1.0			'colsample_bytree':[0.8,1.0]
MDA-MB-453	defaultd	defaultd	100, 'gini', None, 1, 'auto'	defaultd	defaultd		defaulte	defaulte	defaulte	defaulte	0.1, 100		defaultf	defaultf	0.1, 0, 1, 3, 100, 1.0, 0.8	defaultf	defaultf		GCN	'weight_decay':[0, 10e-8, 10e-6, 10e-4],
MDA-MB-468	defaultd	400, 'gini', None, 1, 'sqrt'	defaultd	defaultd	100, 'gini', None, 1, 'auto'		defaulte	'auto', 100	'auto', 100	defaulte	defaulte		0.1, 0.1, 1, 5, 100, 0.8, 1.0	defaultf	defaultf	defaultf	defaultf			'graph_conv_layers': [[64, 64],[128, 128],[256,256]],
SK-BR-3	defaultd	defaultd	defaultd	100, 'gini', None, 1, 'log2'	defaultd		0.2, 100	defaulte	defaulte	defaulte	defaulte		defaultf	0.1, 0.1, 1, 5, 100, 1.0, 0.8	0.1, 0, 1, 5, 100, 0.8, 1.0	defaultf	0.1, 0, 1, 5, 100, 0.8, 1.0			'learning_rate': [0.01,0.001, 0.0001],
T-47D	100, 'entropy', None, 3, 'sqrt'	50, 'entropy', None, 1, 'log2'	defaultd	defaultd	defaultd		0.2, 100	'auto', 10	'auto', 100	defaulte	defaulte		defaultf	0.1, 0, 1, 5, 100, 0.8, 1.0	defaultf	defaultf	defaultf			'dense_layer_size': [64, 128, 256]
																			GAT	'weight_decay':[0, 10e-8, 10e-6, 10e-4],
	Graph::AttentiveFP	Graph::GAT	Graph::GCN	Graph::MPNN																'learning_rate': [0.01,0.001, 0.0001],
Bcap37	defaultg	0, 0.001, 32, 0.5	0.001, [256, 256], 0.0001, 128	defaultj																'n_attention_heads':[8,16,32],
BT-20	defaultg	defaulth	1e-07, [64, 64], 0.001, 256	0.001, 0.001, [64, 64], 2, 32, 16																'dropout': [0,0.1,0.3,0.5]
BT-474	0.1, 100, 1, 2, 0.01, 0.1	1e-07, 0.01, 32, 0	defaulti	defaultj															MPNN	'weight_decay': [10e-8, 10e-6, 10e-4],
BT-549	0, 100, 3, 2, 0.01, 0.1	defaulth	defaulti	defaultj																'learning_rate': [0.01, 0.001, 0.0001],
HBL-100	0.1, 50, 2, 4, 0.01, 0	defaulth	1e-07, [128, 128], 0.01, 256	1e-05, 0.0001, [256, 256], 4, 32, 32																'graph_conv_layers': [[64, 64], [128, 128],[256,256]],
HS-578T	0.1, 100, 3, 2, 0.01, 0.1	defaulth	1e-07, [64, 64], 0.0001, 256	1e-07, 0.0001, [256, 256], 3, 32, 16																'num_layer_set2set':[2,3,4],
MCF-7	defaultg	defaulth	0, [128, 128], 0.0001, 256	defaultj																'node_out_feats':[16,32,64],
MDA-MB-231	defaultg	1e-07, 0.001, 16, 0	0, [256, 256], 0.0001, 256	defaultj																'edge_hidden_feats':[16,32,64]
MDA-MB-361	defaultg	1e-07, 0.01, 8, 0	1e-05, [128, 128], 0.001, 64	defaultj															Attentive FP	'dropout': [0,0.1,0.5],
MDA-MB-435	0, 200, 3, 2, 0.001, 0.1	1e-05, 0.01, 8, 0	defaulti	1e-07, 0.001, [256, 256], 2, 64, 32																'graph_feat_size': [50,100,200],
MDA-MB-453	defaultg	defaulth	0.001, [64, 64], 0.001, 256	1e-05, 0.01, [64, 64], 2, 32, 32																'num_timesteps':[1,2,3],
MDA-MB-468	0.1, 200, 2, 3, 0.001, 0.001	defaulth	defaulti	0.001, 0.001, [64, 64], 4, 64, 16																'num_layers':[2,3,4],
SK-BR-3	defaultg	1e-07, 0.01, 8, 0	defaulti	1e-07, 0.01, [64, 64], 2, 32, 64																'learning_rate': [0.01,0.001, 0.0001],
T-47D	defaultg	0, 0.01, 32, 0	defaulti	1e-07, 0.001, [256, 256], 3, 64, 64																'weight_decay':[0, 10e-4, 10e-2]
*aDNN default: weight_decay_penalty=0.001
bKNN default: n_neighbors=1
cNB default: alpha=1
dRF default: n_estimators=100;max_features='log2'
eSVM default: C=1
fXGBoost default: n_estimators=50
gAttentiveFP default: mode='classification';batch_size=32;learning_rate=0.001
hGAT default: mode='classification';batch_size=32;learning_rate=0.001
iGCN default: batch_size=64;mode='classification';learning_rate=0.001;dense_layer_size=128
jMPNN default: mode='classification';batch_size=32;learning_rate=0.001

## Sheet: Table S2
Table S2. The performance results of models based on RDKit descriptors.
Methods	Cell lines	Training set								Validation set								Test set
		ACCa	F1b	BAc	SEd	SPe	MCCf	AUCg		ACC	F1	BA	SE	SP	MCC	AUC		ACC	F1	BA	SE	SP	MCC	AUC
DNN	Bcap37	0.786364	0.718563	0.768939	0.681818	0.856061	0.549275	0.848097		0.714286	0.6	0.684492	0.545455	0.823529	0.38586	0.695187		0.777778	0.727273	0.769886	0.727273	0.8125	0.539773	0.806818
	BT-20	0.858974	0.88	0.853977	0.883212	0.824742	0.709049	0.931146		0.655172	0.722222	0.632353	0.764706	0.5	0.274285	0.75		0.758621	0.8	0.745098	0.823529	0.666667	0.497568	0.759804
	BT-474	0.878274	0.924976	0.778506	0.951172	0.605839	0.610308	0.923785		0.82716	0.890625	0.73943	0.890625	0.588235	0.47886	0.892463		0.777778	0.865672	0.600184	0.90625	0.294118	0.238175	0.806066
	BT-549	0.758985	0.840559	0.660938	0.942006	0.37987	0.408556	0.850507		0.711864	0.808989	0.607895	0.9	0.315789	0.268744	0.759868		0.70339	0.80663	0.587829	0.9125	0.263158	0.233733	0.622697
	HBL-100	0.841897	0.861111	0.84158	0.843537	0.839623	0.678603	0.925459		0.65625	0.731707	0.630952	0.833333	0.428571	0.288974	0.718254		0.741935	0.777778	0.735043	0.777778	0.692308	0.470085	0.769231
	HS-578T	0.722667	0.839009	0.5	1	0	nan	0.734282		0.723404	0.839506	0.5	1	0	nan	0.794118		0.723404	0.839506	0.5	1	0	nan	0.669683
	MCF-7	0.762318	0.799483	0.75101	0.853464	0.648556	0.516769	0.848674		0.720218	0.765545	0.707502	0.822808	0.592196	0.42919	0.802634		0.723962	0.76581	0.712926	0.812998	0.612854	0.436801	0.801281
	MDA-MB-231	0.780295	0.843494	0.724006	0.929573	0.518439	0.509562	0.866756		0.748214	0.820382	0.689897	0.901961	0.477833	0.430151	0.817774		0.730357	0.806162	0.673766	0.879552	0.46798	0.387687	0.808654
	MDA-MB-361	0.819728	0.860158	0.808418	0.84456	0.772277	0.607633	0.917124		0.837838	0.88	0.804487	0.916667	0.692308	0.636053	0.88141		0.861111	0.893617	0.854167	0.875	0.833333	0.695182	0.913194
	MDA-MB-435	0.808581	0.887324	0.607888	0.967178	0.248598	0.329022	0.827102		0.782178	0.874046	0.544871	0.970339	0.119403	0.171691	0.735328		0.80198	0.88417	0.589647	0.970339	0.208955	0.292972	0.807488
	MDA-MB-453	0.860795	0.865014	0.860602	0.867403	0.853801	0.721333	0.924946		0.818182	0.809524	0.818182	0.772727	0.863636	0.63901	0.882231		0.659091	0.680851	0.659091	0.727273	0.590909	0.321182	0.785124
	MDA-MB-468	0.821901	0.893167	0.6514	0.971264	0.331536	0.428074	0.862159		0.844221	0.904615	0.706957	0.967105	0.446809	0.52164	0.857783		0.813131	0.886154	0.658467	0.947368	0.369565	0.402973	0.829662
	SK-BR-3	0.821098	0.88829	0.694161	0.946634	0.441687	0.470153	0.849224		0.793103	0.871951	0.646865	0.940789	0.352941	0.375161	0.826625		0.792079	0.86875	0.667237	0.914474	0.42	0.385811	0.817632
	T-47D	0.775917	0.855005	0.66393	0.942013	0.385848	0.413632	0.826344		0.745223	0.836066	0.623211	0.927273	0.319149	0.31916	0.767118		0.744409	0.831933	0.638172	0.9	0.376344	0.327224	0.75044
KNN	Bcap37	0.995455	0.994286	0.994318	0.988636	1	0.990557	0.994318		0.892857	0.842105	0.863636	0.727273	1	0.786245	0.863636		0.777778	0.727273	0.769886	0.727273	0.8125	0.539773	0.769886
	BT-20	0.854701	0.875	0.851832	0.868613	0.835052	0.701661	0.919031		0.896552	0.909091	0.89951	0.882353	0.916667	0.791299	0.946078		0.724138	0.789474	0.691176	0.882353	0.5	0.421332	0.791667
	BT-474	1	1	1	1	1	1	1		0.864198	0.918519	0.719669	0.96875	0.470588	0.543856	0.719669		0.765432	0.850394	0.657169	0.84375	0.470588	0.307897	0.657169
	BT-549	0.997886	0.99843	0.998433	0.996865	1	0.995205	0.99999		0.79661	0.855422	0.746382	0.8875	0.605263	0.517906	0.830099		0.669492	0.760736	0.611184	0.775	0.447368	0.227477	0.642434
	HBL-100	0.996047	0.99661	0.995283	1	0.990566	0.991904	0.995283		0.78125	0.810811	0.77381	0.833333	0.714286	0.553134	0.77381		0.806452	0.842105	0.790598	0.888889	0.692308	0.599404	0.790598
	HS-578T	1	1	1	1	1	1	1		0.808511	0.865672	0.772624	0.852941	0.692308	0.533316	0.772624		0.765957	0.835821	0.719457	0.823529	0.615385	0.429309	0.719457
	MCF-7	0.996213	0.99658	0.996513	0.993792	0.999235	0.992358	0.999971		0.750511	0.779681	0.744969	0.795218	0.694721	0.49287	0.831897		0.755276	0.782845	0.750401	0.794605	0.706197	0.502963	0.82685
	MDA-MB-231	0.998103	0.99851	0.998247	0.997722	0.998771	0.995903	0.999992		0.779464	0.831629	0.751062	0.854342	0.647783	0.514273	0.836616		0.778571	0.828017	0.756737	0.836134	0.67734	0.517514	0.843717
	MDA-MB-361	0.996599	0.997416	0.99505	1	0.990099	0.992469	0.99505		0.756757	0.816327	0.724359	0.833333	0.615385	0.457604	0.724359		0.888889	0.916667	0.875	0.916667	0.833333	0.75	0.875
	MDA-MB-435	0.996287	0.997613	0.996948	0.995765	0.998131	0.989291	0.999957		0.834983	0.898785	0.701682	0.940678	0.462687	0.470733	0.861845		0.821782	0.890244	0.687864	0.927966	0.447761	0.430722	0.812642
	MDA-MB-453	0.994318	0.994505	0.994152	1	0.988304	0.988687	0.994152		0.75	0.744186	0.75	0.727273	0.772727	0.500517	0.75		0.795455	0.808511	0.795455	0.863636	0.727273	0.596481	0.795455
	MDA-MB-468	0.999371	0.999589	0.999589	0.999179	1	0.998245	0.999999		0.869347	0.917722	0.774846	0.953947	0.595745	0.613245	0.906635		0.823232	0.885246	0.748427	0.888158	0.608696	0.500699	0.835598
	SK-BR-3	0.998766	0.999179	0.998349	0.999179	0.997519	0.996698	0.998349		0.82266	0.883871	0.744776	0.901316	0.588235	0.511176	0.744776		0.80198	0.868421	0.734211	0.868421	0.6	0.468421	0.734211
	T-47D	0.998006	0.998577	0.998579	0.997157	1	0.995261	0.999991		0.764331	0.837719	0.694729	0.868182	0.521277	0.412794	0.807713		0.782748	0.849558	0.72131	0.872727	0.569892	0.461846	0.80391
NB	Bcap37	0.645455	0.602041	0.649621	0.670455	0.628788	0.293245	0.733514		0.678571	0.608696	0.671123	0.636364	0.705882	0.33776	0.71123		0.703704	0.714286	0.735795	0.909091	0.5625	0.479841	0.821023
	BT-20	0.709402	0.728	0.718715	0.664234	0.773196	0.431243	0.770336		0.655172	0.6875	0.656863	0.647059	0.666667	0.309211	0.784314		0.689655	0.727273	0.686275	0.705882	0.666667	0.368949	0.789216
	BT-474	0.775039	0.854582	0.689018	0.837891	0.540146	0.360244	0.780708		0.790123	0.861789	0.737592	0.828125	0.647059	0.43505	0.834559		0.716049	0.818898	0.582721	0.8125	0.352941	0.162051	0.682904
	BT-549	0.665962	0.776521	0.561744	0.860502	0.262987	0.150715	0.64958		0.677966	0.791209	0.555263	0.9	0.210526	0.150849	0.612007		0.644068	0.764045	0.530263	0.85	0.210526	0.0753795	0.52023
	HBL-100	0.640316	0.701639	0.62338	0.727891	0.518868	0.251417	0.6744		0.71875	0.780488	0.694444	0.888889	0.5	0.429082	0.797619		0.580645	0.628571	0.574786	0.611111	0.538462	0.14831	0.589744
	HS-578T	0.682667	0.788632	0.573056	0.819188	0.326923	0.157563	0.694614		0.744681	0.833333	0.633484	0.882353	0.384615	0.303499	0.68552		0.702128	0.8	0.604072	0.823529	0.384615	0.219902	0.69457
	MCF-7	0.56859	0.630651	0.556827	0.663397	0.450258	0.115952	0.583848		0.584411	0.64183	0.573709	0.670754	0.476664	0.149872	0.599878		0.568754	0.636024	0.555124	0.678725	0.431523	0.113457	0.580627
	MDA-MB-231	0.604664	0.704479	0.553693	0.739839	0.367548	0.112781	0.591974		0.591071	0.692617	0.541147	0.722689	0.359606	0.0857582	0.578656		0.620536	0.714574	0.573288	0.745098	0.401478	0.152621	0.604212
	MDA-MB-361	0.758503	0.819338	0.724029	0.834197	0.613861	0.456242	0.826938		0.675676	0.777778	0.591346	0.875	0.307692	0.222683	0.767628		0.75	0.8	0.75	0.75	0.75	0.478091	0.894097
	MDA-MB-435	0.758251	0.856654	0.544781	0.926945	0.162617	0.128001	0.611173		0.772277	0.865497	0.559891	0.940678	0.179104	0.177484	0.606533		0.759076	0.859345	0.524696	0.944915	0.104478	0.0825561	0.582785
	MDA-MB-453	0.6875	0.717949	0.684986	0.773481	0.596491	0.3765	0.796259		0.704545	0.697674	0.704545	0.681818	0.727273	0.409514	0.768595		0.704545	0.723404	0.704545	0.772727	0.636364	0.412948	0.764463
	MDA-MB-468	0.745123	0.842105	0.583511	0.8867	0.280323	0.196651	0.681543		0.753769	0.846395	0.603653	0.888158	0.319149	0.239691	0.691069		0.681818	0.803738	0.489559	0.848684	0.130435	-0.0249408	0.5999
	SK-BR-3	0.724244	0.822125	0.598994	0.848112	0.349876	0.213487	0.66691		0.689655	0.802508	0.5387	0.842105	0.235294	0.0878891	0.684533		0.707921	0.805281	0.611316	0.802632	0.42	0.221167	0.656184
	T-47D	0.682217	0.778056	0.606713	0.794201	0.419226	0.220134	0.681609		0.694268	0.789474	0.611219	0.818182	0.404255	0.235765	0.699371		0.629393	0.742222	0.540836	0.759091	0.322581	0.0845514	0.630718
RF	Bcap37	0.995455	0.994286	0.994318	0.988636	1	0.990557	0.999957		0.75	0.695652	0.745989	0.727273	0.764706	0.48553	0.882353		0.740741	0.631579	0.710227	0.545455	0.875	0.452432	0.815341
	BT-20	0.987179	0.989011	0.987546	0.985401	0.989691	0.973664	0.99857		0.896552	0.909091	0.89951	0.882353	0.916667	0.791299	0.97549		0.827586	0.848485	0.828431	0.823529	0.833333	0.650516	0.796569
	BT-474	0.967643	0.979866	0.926031	0.998047	0.854015	0.901525	0.998004		0.839506	0.905109	0.660846	0.96875	0.352941	0.439084	0.90625		0.802469	0.880597	0.637408	0.921875	0.352941	0.326672	0.840993
	BT-549	0.997886	0.998435	0.996753	1	0.993506	0.995189	0.99999		0.762712	0.83908	0.679934	0.9125	0.447368	0.417745	0.801316		0.728814	0.818182	0.634211	0.9	0.368421	0.322037	0.663487
	HBL-100	0.992095	0.993197	0.991882	0.993197	0.990566	0.983763	0.99984		0.6875	0.736842	0.674603	0.777778	0.571429	0.35783	0.81746		0.83871	0.864865	0.82906	0.888889	0.769231	0.666723	0.869658
	HS-578T	0.896	0.932174	0.821388	0.98893	0.653846	0.734505	0.971065		0.787234	0.868421	0.63914	0.970588	0.307692	0.403724	0.882353		0.829787	0.888889	0.739819	0.941176	0.538462	0.54527	0.774887
	MCF-7	0.982767	0.984525	0.982198	0.987354	0.977042	0.965105	0.998801		0.756637	0.787897	0.749499	0.814224	0.684774	0.504616	0.83458		0.756978	0.788256	0.749806	0.814838	0.684774	0.505302	0.829493
	MDA-MB-231	0.981924	0.985886	0.978411	0.99124	0.965581	0.960865	0.998714		0.78125	0.841424	0.732276	0.910364	0.554187	0.510383	0.852005		0.782143	0.838624	0.742007	0.887955	0.596059	0.514092	0.861176
	MDA-MB-361	0.989796	0.992167	0.992228	0.984456	1	0.977782	0.99982		0.891892	0.916667	0.88141	0.916667	0.846154	0.762821	0.932692		0.861111	0.893617	0.854167	0.875	0.833333	0.695182	0.961806
	MDA-MB-435	0.995462	0.997086	0.994409	0.996294	0.992523	0.986841	0.99987		0.825083	0.89505	0.657918	0.957627	0.358209	0.415279	0.841007		0.811881	0.887129	0.638755	0.949153	0.328358	0.364886	0.822255
	MDA-MB-453	0.991477	0.991736	0.99139	0.994475	0.988304	0.982954	0.999322		0.818182	0.818182	0.818182	0.818182	0.818182	0.636364	0.909091		0.75	0.765957	0.75	0.818182	0.681818	0.504715	0.845041
	MDA-MB-468	0.923222	0.952232	0.837454	0.998358	0.67655	0.780354	0.993141		0.854271	0.911315	0.713536	0.980263	0.446809	0.556989	0.889698		0.843434	0.906344	0.678204	0.986842	0.369565	0.511027	0.89016
	SK-BR-3	0.921036	0.950039	0.842021	0.999179	0.684864	0.785452	0.987462		0.817734	0.890208	0.650284	0.986842	0.313725	0.458592	0.82727		0.821782	0.891566	0.666842	0.973684	0.36	0.462269	0.8725
	T-47D	0.969697	0.978759	0.952332	0.995452	0.909212	0.927546	0.99759		0.783439	0.857741	0.683994	0.931818	0.43617	0.440256	0.854014		0.789137	0.861345	0.691716	0.931818	0.451613	0.454028	0.840714
SVM	Bcap37	0.868182	0.830409	0.857955	0.806818	0.909091	0.72358	0.937285		0.785714	0.7	0.759358	0.636364	0.882353	0.542441	0.770053		0.703704	0.636364	0.693182	0.636364	0.75	0.386364	0.755682
	BT-20	0.837607	0.859259	0.835729	0.846715	0.824742	0.667849	0.899767		0.758621	0.758621	0.781863	0.647059	0.916667	0.563725	0.833333		0.758621	0.8	0.745098	0.823529	0.666667	0.497568	0.803922
	BT-474	0.858243	0.914815	0.712349	0.964844	0.459854	0.524395	0.921077		0.851852	0.909091	0.733456	0.9375	0.529412	0.517992	0.839154		0.814815	0.892086	0.602022	0.96875	0.235294	0.317272	0.835478
	BT-549	0.755814	0.840359	0.65019	0.952978	0.347403	0.399966	0.835194		0.745763	0.833333	0.639803	0.9375	0.342105	0.363367	0.702961		0.728814	0.822222	0.620395	0.925	0.315789	0.312923	0.646053
	HBL-100	0.754941	0.793333	0.744385	0.809524	0.679245	0.493253	0.874888		0.75	0.777778	0.746032	0.777778	0.714286	0.492063	0.815476		0.677419	0.736842	0.65812	0.777778	0.538462	0.326146	0.75641
	HS-578T	0.861333	0.911565	0.758888	0.98893	0.528846	0.641061	0.930989		0.787234	0.868421	0.63914	0.970588	0.307692	0.403724	0.794118		0.808511	0.876712	0.701357	0.941176	0.461538	0.479327	0.771493
	MCF-7	0.60748	0.687595	0.586318	0.77805	0.394586	0.187436	0.651194		0.608237	0.688498	0.586961	0.77989	0.394032	0.189064	0.669217		0.602791	0.68502	0.581068	0.77805	0.384086	0.176841	0.635136
	MDA-MB-231	0.677751	0.784252	0.58656	0.919587	0.253534	0.237626	0.695044		0.691964	0.792294	0.604873	0.921569	0.288177	0.279002	0.679436		0.649107	0.759339	0.565947	0.868347	0.263547	0.165227	0.678199
	MDA-MB-361	0.877551	0.907216	0.861899	0.911917	0.811881	0.727314	0.935592		0.756757	0.808511	0.741987	0.791667	0.692308	0.4764	0.788462		0.888889	0.913043	0.895833	0.875	0.916667	0.765532	0.920139
	MDA-MB-435	0.810231	0.889263	0.598229	0.977766	0.218692	0.329101	0.83764		0.772277	0.868069	0.533171	0.961864	0.104478	0.123107	0.723691		0.811881	0.88932	0.612035	0.970339	0.253731	0.344326	0.781811
	MDA-MB-453	0.835227	0.831395	0.836548	0.790055	0.883041	0.674667	0.921198		0.795455	0.780488	0.795455	0.727273	0.863636	0.596481	0.88843		0.681818	0.681818	0.681818	0.681818	0.681818	0.363636	0.768595
	MDA-MB-468	0.824418	0.894278	0.659603	0.968801	0.350404	0.439167	0.832688		0.849246	0.909091	0.695549	0.986842	0.404255	0.540675	0.833707		0.792929	0.877612	0.592248	0.967105	0.217391	0.294454	0.766876
	SK-BR-3	0.809377	0.885087	0.639871	0.977011	0.30273	0.417235	0.862089		0.837438	0.902077	0.676471	1	0.352941	0.538502	0.847136		0.79703	0.878338	0.616842	0.973684	0.26	0.363267	0.828684
	T-47D	0.778309	0.856996	0.664486	0.947129	0.381842	0.420363	0.824149		0.767516	0.850716	0.648259	0.945455	0.351064	0.387565	0.759865		0.731629	0.825	0.616667	0.9	0.333333	0.284318	0.709433
XGBoost	Bcap37	0.95	0.936416	0.945076	0.920455	0.969697	0.895604	0.989626		0.642857	0.545455	0.625668	0.545455	0.705882	0.251337	0.73262		0.703704	0.6	0.678977	0.545455	0.8125	0.373101	0.869318
	BT-20	0.987179	0.989091	0.986041	0.992701	0.979381	0.973585	0.999774		0.896552	0.909091	0.89951	0.882353	0.916667	0.791299	0.946078		0.793103	0.823529	0.786765	0.823529	0.75	0.573529	0.848039
	BT-474	0.990755	0.994152	0.983448	0.996094	0.970803	0.972136	0.999758		0.839506	0.902256	0.704044	0.9375	0.470588	0.467793	0.877757		0.839506	0.900763	0.725643	0.921875	0.529412	0.486033	0.83364
	BT-549	0.994715	0.996091	0.992723	0.998433	0.987013	0.98796	0.999959		0.754237	0.834286	0.666776	0.9125	0.421053	0.393437	0.812171		0.711864	0.8	0.635526	0.85	0.421053	0.297708	0.696053
	HBL-100	0.996047	0.99661	0.995283	1	0.990566	0.991904	0.999968		0.6875	0.75	0.666667	0.833333	0.5	0.356753	0.734127		0.83871	0.864865	0.82906	0.888889	0.769231	0.666723	0.850427
	HS-578T	0.978667	0.985401	0.964501	0.99631	0.932692	0.946597	0.999148		0.851064	0.901408	0.778281	0.941176	0.615385	0.608307	0.914027		0.808511	0.873239	0.725113	0.911765	0.538462	0.492086	0.837104
	MCF-7	0.832227	0.853513	0.826255	0.880365	0.772145	0.659321	0.91437		0.724302	0.761062	0.716044	0.790926	0.641163	0.438074	0.785916		0.708305	0.748015	0.699432	0.77989	0.618975	0.405025	0.776952
	MDA-MB-231	0.836532	0.881309	0.792663	0.952873	0.632452	0.641992	0.922305		0.75	0.823009	0.688641	0.911765	0.465517	0.434328	0.81313		0.746429	0.815104	0.696996	0.876751	0.517241	0.428603	0.814817
	MDA-MB-361	0.972789	0.979058	0.974555	0.968912	0.980198	0.940655	0.994998		0.837838	0.88	0.804487	0.916667	0.692308	0.636053	0.935897		0.888889	0.913043	0.895833	0.875	0.916667	0.765532	0.965278
	MDA-MB-435	0.970297	0.981152	0.942759	0.992059	0.893458	0.912379	0.997273		0.80198	0.879032	0.648432	0.923729	0.373134	0.353044	0.80148		0.811881	0.884848	0.665476	0.927966	0.402985	0.389835	0.83541
	MDA-MB-453	0.977273	0.977778	0.977416	0.972376	0.982456	0.954585	0.998481		0.772727	0.782609	0.772727	0.818182	0.727273	0.547723	0.902893		0.795455	0.808511	0.795455	0.863636	0.727273	0.596481	0.828512
	MDA-MB-468	0.976086	0.984565	0.95441	0.995074	0.913747	0.932543	0.99848		0.884422	0.9279	0.784714	0.973684	0.595745	0.658381	0.911114		0.863636	0.914286	0.767162	0.947368	0.586957	0.591532	0.886156
	SK-BR-3	0.995065	0.996719	0.992565	0.997537	0.987593	0.986774	0.999517		0.832512	0.893082	0.731811	0.934211	0.529412	0.520854	0.856295		0.841584	0.897436	0.760526	0.921053	0.6	0.55412	0.886974
	T-47D	0.931818	0.95288	0.897347	0.982945	0.811749	0.835108	0.980942		0.802548	0.869748	0.709816	0.940909	0.478723	0.495234	0.819004		0.782748	0.854701	0.696481	0.909091	0.483871	0.442711	0.819795
aACC: Accuracy. bF1: F1-measure. cBA: Balanced accuracy. dSE:Sensitivity. eSP:Specificity. fMCC:Matthews correlation coefficient. gAUC:The area under receiver operating characteristic.

## Sheet: Table S3
Table S3. The performance results of models based on AtomPairs fingerprints.
Methods	Cell lines	Training set								Validation set								Test set
		ACCa	F1b	BAc	SEd	SPe	MCCf	AUCg		ACC	F1	BA	SE	SP	MCC	AUC		ACC	F1	BA	SE	SP	MCC	AUC
DNN	Bcap37	0.904545	0.890052	0.914773	0.965909	0.863636	0.814436	0.970257		0.785714	0.75	0.791444	0.818182	0.764706	0.570806	0.893048		0.814815	0.782609	0.815341	0.818182	0.8125	0.623635	0.801136
	BT-20	0.995726	0.996337	0.99635	0.992701	1	0.991247	0.999925		0.724138	0.75	0.727941	0.705882	0.75	0.449323	0.916667		0.758621	0.810811	0.732843	0.882353	0.583333	0.495761	0.852941
	BT-474	0.972265	0.982524	0.950345	0.988281	0.912409	0.915736	0.99146		0.876543	0.924242	0.77068	0.953125	0.588235	0.600585	0.900735		0.82716	0.892308	0.717831	0.90625	0.529412	0.456716	0.844669
	BT-549	0.993658	0.995313	0.991099	0.998433	0.983766	0.985555	0.999613		0.79661	0.858824	0.732566	0.9125	0.552632	0.510872	0.826316		0.737288	0.814371	0.675	0.85	0.5	0.37159	0.652961
	HBL-100	0.988142	0.989831	0.987165	0.993197	0.981132	0.975645	0.99939		0.71875	0.756757	0.710317	0.777778	0.642857	0.424871	0.869048		0.741935	0.777778	0.735043	0.777778	0.692308	0.470085	0.824786
	HS-578T	1	1	1	1	1	1	1		0.893617	0.929577	0.831448	0.970588	0.692308	0.724529	0.88914		0.808511	0.869565	0.748869	0.882353	0.615385	0.510607	0.81448
	MCF-7	0.966471	0.970099	0.964831	0.97969	0.949971	0.932179	0.995054		0.780463	0.805781	0.775518	0.820356	0.730681	0.553981	0.85921		0.782165	0.80653	0.777735	0.817903	0.737567	0.557701	0.853492
	MDA-MB-231	0.90337	0.927239	0.879485	0.966713	0.792256	0.789962	0.972162		0.789286	0.843085	0.751859	0.887955	0.615764	0.531165	0.863668		0.795536	0.847841	0.758355	0.893557	0.623153	0.545347	0.854701
	MDA-MB-361	0.986395	0.989583	0.987277	0.984456	0.990099	0.970086	0.999513		0.783784	0.84	0.745192	0.875	0.615385	0.51219	0.926282		0.888889	0.913043	0.895833	0.875	0.916667	0.765532	0.930556
	MDA-MB-435	0.921617	0.950803	0.857934	0.971943	0.743925	0.762911	0.971838		0.828383	0.894737	0.692101	0.936441	0.447761	0.44837	0.854794		0.834983	0.899598	0.690994	0.949153	0.432836	0.463448	0.863838
	MDA-MB-453	0.988636	0.989011	0.988466	0.994475	0.982456	0.97731	0.999838		0.727273	0.769231	0.727273	0.909091	0.545455	0.48795	0.889463		0.795455	0.823529	0.795455	0.954545	0.636364	0.623302	0.876033
	MDA-MB-468	0.984896	0.990156	0.977964	0.990969	0.96496	0.957729	0.998616		0.879397	0.924051	0.788774	0.960526	0.617021	0.644321	0.902856		0.878788	0.922581	0.807351	0.940789	0.673913	0.646558	0.89109
	SK-BR-3	0.94818	0.966667	0.895782	1	0.791563	0.86052	0.99449		0.852217	0.908537	0.725426	0.980263	0.470588	0.57584	0.895769		0.841584	0.900621	0.726974	0.953947	0.5	0.536553	0.859868
	T-47D	0.939793	0.958276	0.908782	0.985787	0.831776	0.854774	0.987919		0.761146	0.840085	0.671132	0.895455	0.446809	0.386882	0.817191		0.830671	0.886994	0.752297	0.945455	0.55914	0.571749	0.866129
KNN	Bcap37	0.995455	0.994286	0.994318	0.988636	1	0.990557	0.999957		0.75	0.695652	0.745989	0.727273	0.764706	0.48553	0.836898		0.851852	0.8	0.832386	0.727273	0.9375	0.692902	0.869318
	BT-20	1	1	1	1	1	1	1		0.896552	0.909091	0.89951	0.882353	0.916667	0.791299	0.970588		0.827586	0.848485	0.828431	0.823529	0.833333	0.650516	0.862745
	BT-474	1	1	1	1	1	1	1		0.864198	0.914729	0.784467	0.921875	0.647059	0.581915	0.870404		0.82716	0.890625	0.73943	0.890625	0.588235	0.47886	0.79182
	BT-549	0.997886	0.99843	0.998433	0.996865	1	0.995205	0.99999		0.855932	0.89697	0.817763	0.925	0.710526	0.661613	0.85		0.720339	0.792453	0.683224	0.7875	0.578947	0.364001	0.688816
	HBL-100	0.996047	0.99661	0.995283	1	0.990566	0.991904	0.995283		0.8125	0.842105	0.801587	0.888889	0.714286	0.61807	0.801587		0.806452	0.842105	0.790598	0.888889	0.692308	0.599404	0.790598
	HS-578T	1	1	1	1	1	1	1		0.851064	0.898551	0.802036	0.911765	0.692308	0.619691	0.802036		0.765957	0.830769	0.743213	0.794118	0.692308	0.459184	0.743213
	MCF-7	0.994596	0.995114	0.99501	0.991263	0.998756	0.989107	0.99994		0.793737	0.813996	0.79135	0.812998	0.769702	0.582525	0.875065		0.799183	0.818014	0.797471	0.812998	0.781943	0.594095	0.871201
	MDA-MB-231	0.99721	0.997807	0.997546	0.996321	0.998771	0.993984	0.999982		0.833036	0.869322	0.818579	0.871148	0.76601	0.638186	0.878729		0.819643	0.857746	0.807012	0.852941	0.761084	0.611499	0.886163
	MDA-MB-361	0.85034	0.876404	0.869492	0.80829	0.930693	0.706065	0.940466		0.945946	0.956522	0.958333	0.916667	1	0.891316	0.947115		0.861111	0.888889	0.875	0.833333	0.916667	0.717137	0.9375
	MDA-MB-435	0.996287	0.997612	0.997618	0.995236	1	0.989328	0.99996		0.831683	0.89613	0.704908	0.932203	0.477612	0.465791	0.824627		0.848185	0.904167	0.758253	0.919492	0.597015	0.541313	0.870099
	MDA-MB-453	0.994318	0.994505	0.994152	1	0.988304	0.988687	0.994152		0.75	0.765957	0.75	0.818182	0.681818	0.504715	0.75		0.795455	0.808511	0.795455	0.863636	0.727273	0.596481	0.795455
	MDA-MB-468	0.999371	0.999589	0.999589	0.999179	1	0.998245	0.999589		0.834171	0.892508	0.759169	0.901316	0.617021	0.530507	0.759169		0.843434	0.894915	0.814645	0.868421	0.76087	0.593339	0.814645
	SK-BR-3	0.863048	0.911624	0.785169	0.940066	0.630273	0.614282	0.931211		0.852217	0.90566	0.757998	0.947368	0.568627	0.579693	0.876161		0.811881	0.878981	0.713947	0.907895	0.52	0.4634	0.831053
	T-47D	0.998006	0.998577	0.998579	0.997157	1	0.995261	0.999991		0.783439	0.85022	0.720551	0.877273	0.56383	0.46362	0.850725		0.801917	0.859729	0.759775	0.863636	0.655914	0.522857	0.841153
NB	Bcap37	0.736364	0.613333	0.700758	0.522727	0.878788	0.437226	0.830449		0.642857	0.444444	0.593583	0.363636	0.823529	0.2111	0.73262		0.666667	0.571429	0.647727	0.545455	0.75	0.300623	0.755682
	BT-20	0.777778	0.779661	0.799684	0.671533	0.927835	0.597661	0.877192		0.724138	0.692308	0.764706	0.529412	1	0.563602	0.823529		0.724138	0.75	0.727941	0.705882	0.75	0.449323	0.789216
	BT-474	0.748844	0.819491	0.784686	0.722656	0.846715	0.47478	0.85951		0.679012	0.763636	0.710478	0.65625	0.764706	0.346049	0.804688		0.740741	0.817391	0.74954	0.734375	0.764706	0.420862	0.767463
	BT-549	0.654334	0.695814	0.690831	0.586207	0.795455	0.358727	0.765478		0.618644	0.676259	0.635855	0.5875	0.684211	0.253917	0.621053		0.542373	0.584615	0.579605	0.475	0.684211	0.150546	0.623355
	HBL-100	0.774704	0.767347	0.80086	0.639456	0.962264	0.609435	0.916763		0.53125	0.571429	0.527778	0.555556	0.5	0.0552278	0.670635		0.645161	0.645161	0.662393	0.555556	0.769231	0.324786	0.760684
	HS-578T	0.730667	0.79089	0.751437	0.704797	0.798077	0.454149	0.852931		0.744681	0.8125	0.728507	0.764706	0.692308	0.425456	0.75		0.595745	0.677966	0.60181	0.588235	0.615385	0.182537	0.687783
	MCF-7	0.553017	0.522348	0.567011	0.440221	0.693801	0.137171	0.60061		0.566031	0.54513	0.57813	0.468424	0.687835	0.158581	0.620119		0.552076	0.51582	0.567232	0.429798	0.704667	0.138406	0.598974
	MDA-MB-231	0.54865	0.559224	0.58602	0.449544	0.722495	0.169853	0.635464		0.566071	0.578856	0.603352	0.467787	0.738916	0.20346	0.639323		0.544643	0.552632	0.583889	0.441176	0.726601	0.166135	0.627416
	MDA-MB-361	0.806122	0.830861	0.842892	0.725389	0.960396	0.651479	0.904119		0.783784	0.818182	0.798077	0.75	0.846154	0.571079	0.849359		0.833333	0.857143	0.875	0.75	1	0.707107	0.930556
	MDA-MB-435	0.581271	0.661779	0.651623	0.525675	0.77757	0.252387	0.734913		0.554455	0.64	0.612446	0.508475	0.716418	0.187301	0.669934		0.587459	0.675325	0.633633	0.550847	0.716418	0.221862	0.71958
	MDA-MB-453	0.795455	0.781818	0.797874	0.712707	0.883041	0.602641	0.863074		0.727273	0.7	0.727273	0.636364	0.818182	0.46225	0.818182		0.727273	0.684211	0.727273	0.590909	0.863636	0.472456	0.802686
	MDA-MB-468	0.716803	0.79128	0.735609	0.700328	0.770889	0.40536	0.808236		0.678392	0.762963	0.679241	0.677632	0.680851	0.309924	0.734462		0.651515	0.737643	0.666905	0.638158	0.695652	0.28404	0.759153
	SK-BR-3	0.60765	0.672165	0.680803	0.535304	0.826303	0.314459	0.739093		0.566502	0.645161	0.606295	0.526316	0.686275	0.184681	0.668021		0.613861	0.677686	0.689737	0.539474	0.84	0.329502	0.724276
	T-47D	0.725279	0.794635	0.703341	0.757817	0.648865	0.386915	0.777268		0.72293	0.795294	0.692602	0.768182	0.617021	0.370574	0.749492		0.667732	0.747573	0.645699	0.7	0.591398	0.273461	0.696383
RF	Bcap37	0.995455	0.99435	0.996212	1	0.992424	0.990592	0.999957		0.785714	0.75	0.791444	0.818182	0.764706	0.570806	0.868984		0.740741	0.666667	0.724432	0.636364	0.8125	0.456716	0.775568
	BT-20	1	1	1	1	1	1	1		0.793103	0.8125	0.79902	0.764706	0.833333	0.589434	0.919118		0.758621	0.810811	0.732843	0.882353	0.583333	0.495761	0.860294
	BT-474	1	1	1	1	1	1	1		0.851852	0.911765	0.690257	0.96875	0.411765	0.493058	0.918199		0.82716	0.897059	0.653033	0.953125	0.352941	0.39659	0.846048
	BT-549	0.997886	0.998433	0.997593	0.998433	0.996753	0.995186	0.99999		0.822034	0.877193	0.758224	0.9375	0.578947	0.574461	0.877632		0.788136	0.855491	0.7125	0.925	0.5	0.485975	0.7125
	HBL-100	0.916996	0.929293	0.912784	0.938776	0.886792	0.829087	0.977249		0.84375	0.871795	0.829365	0.944444	0.714286	0.688021	0.869048		0.741935	0.777778	0.735043	0.777778	0.692308	0.470085	0.831197
	HS-578T	1	1	1	1	1	1	1		0.787234	0.868421	0.63914	0.970588	0.307692	0.403724	0.863122		0.829787	0.885714	0.763575	0.911765	0.615385	0.556926	0.838235
	MCF-7	0.994596	0.995134	0.994506	0.995325	0.993687	0.989059	0.999932		0.803608	0.825522	0.79948	0.83691	0.76205	0.601307	0.885245		0.804289	0.825705	0.800473	0.835071	0.765876	0.602838	0.880052
	MDA-MB-231	0.99721	0.997811	0.996885	0.998073	0.995698	0.993968	0.999921		0.841071	0.880857	0.810538	0.921569	0.699507	0.649337	0.894121		0.816071	0.860622	0.787743	0.890756	0.684729	0.594121	0.886375
	MDA-MB-361	0.901361	0.923885	0.896553	0.911917	0.881188	0.784401	0.961653		0.918919	0.938776	0.902244	0.958333	0.846154	0.820419	0.945513		0.861111	0.893617	0.854167	0.875	0.833333	0.695182	0.954861
	MDA-MB-435	0.996287	0.997615	0.996278	0.996294	0.996262	0.98926	0.99996		0.831683	0.898608	0.672843	0.957627	0.38806	0.443373	0.897135		0.848185	0.907631	0.710157	0.957627	0.462687	0.509946	0.870067
	MDA-MB-453	0.994318	0.994475	0.994314	0.994475	0.994152	0.988627	0.999935		0.863636	0.857143	0.863636	0.818182	0.909091	0.730297	0.927686		0.840909	0.844444	0.840909	0.863636	0.818182	0.682524	0.88843
	MDA-MB-468	0.999371	0.99959	0.998652	1	0.997305	0.998242	0.999999		0.889447	0.930818	0.795353	0.973684	0.617021	0.674576	0.921823		0.873737	0.92163	0.766161	0.967105	0.565217	0.618638	0.920266
	SK-BR-3	0.998149	0.998769	0.997108	0.999179	0.995037	0.995044	0.999954		0.832512	0.895062	0.712268	0.953947	0.470588	0.511889	0.884481		0.831683	0.892405	0.733816	0.927632	0.54	0.516413	0.866974
	T-47D	0.997608	0.998294	0.997145	0.998294	0.995995	0.994289	0.999987		0.802548	0.867521	0.722002	0.922727	0.521277	0.499073	0.864338		0.811502	0.8742	0.72935	0.931818	0.526882	0.519747	0.887463
SVM	Bcap37	0.995455	0.994286	0.994318	0.988636	1	0.990557	0.999957		0.785714	0.727273	0.775401	0.727273	0.823529	0.550802	0.770053		0.777778	0.7	0.755682	0.636364	0.875	0.533002	0.789773
	BT-20	0.893162	0.908425	0.890699	0.905109	0.876289	0.780254	0.936715		0.793103	0.8125	0.79902	0.764706	0.833333	0.589434	0.867647		0.724138	0.789474	0.691176	0.882353	0.5	0.421332	0.828431
	BT-474	0.915254	0.947166	0.850058	0.962891	0.737226	0.735948	0.966654		0.777778	0.863636	0.621783	0.890625	0.352941	0.270212	0.884191		0.864198	0.917293	0.741268	0.953125	0.529412	0.553133	0.852022
	BT-549	0.85518	0.898141	0.806146	0.946708	0.665584	0.660292	0.931459		0.745763	0.825581	0.667434	0.8875	0.447368	0.377512	0.803618		0.788136	0.855491	0.7125	0.925	0.5	0.485975	0.675329
	HBL-100	0.996047	0.996587	0.996599	0.993197	1	0.991925	0.999968		0.71875	0.756757	0.710317	0.777778	0.642857	0.424871	0.865079		0.741935	0.777778	0.735043	0.777778	0.692308	0.470085	0.739316
	HS-578T	0.997333	0.998158	0.995192	1	0.990385	0.99335	1		0.808511	0.88	0.677602	0.970588	0.384615	0.476125	0.875566		0.765957	0.857143	0.600679	0.970588	0.230769	0.322786	0.803167
	MCF-7	0.920603	0.928302	0.919956	0.925812	0.9141	0.839369	0.977086		0.785228	0.808846	0.781102	0.818516	0.743688	0.56408	0.857388		0.78727	0.809509	0.783929	0.814224	0.753634	0.568729	0.860168
	MDA-MB-231	0.935171	0.949701	0.925457	0.960932	0.889982	0.859034	0.983875		0.816071	0.858127	0.794649	0.872549	0.716749	0.597568	0.862906		0.809821	0.852595	0.789747	0.862745	0.716749	0.585096	0.86866
	MDA-MB-361	0.904762	0.925926	0.903863	0.906736	0.90099	0.794153	0.965398		0.810811	0.862745	0.766026	0.916667	0.615385	0.571938	0.929487		0.861111	0.893617	0.854167	0.875	0.833333	0.695182	0.958333
	MDA-MB-435	0.833746	0.90125	0.656859	0.973531	0.340187	0.44225	0.915389		0.805281	0.88499	0.607798	0.961864	0.253731	0.319453	0.825987		0.821782	0.894942	0.629079	0.974576	0.283582	0.389392	0.829623
	MDA-MB-453	0.877841	0.877493	0.878631	0.850829	0.906433	0.757396	0.955543		0.795455	0.8	0.795455	0.818182	0.772727	0.59152	0.884298		0.795455	0.816327	0.795455	0.909091	0.681818	0.606788	0.818182
	MDA-MB-468	0.995595	0.997132	0.991503	0.999179	0.983827	0.987673	0.999014		0.879397	0.924528	0.781425	0.967105	0.595745	0.642765	0.838606		0.863636	0.913738	0.774743	0.940789	0.608696	0.59531	0.859983
	SK-BR-3	0.841456	0.902467	0.705217	0.97619	0.434243	0.534834	0.915036		0.837438	0.900302	0.696014	0.980263	0.411765	0.526613	0.850748		0.821782	0.890909	0.673553	0.967105	0.38	0.462969	0.855263
	T-47D	0.948963	0.964105	0.929885	0.97726	0.88251	0.876835	0.9872		0.770701	0.843478	0.696228	0.881818	0.510638	0.423492	0.818037		0.830671	0.883002	0.777126	0.909091	0.645161	0.580681	0.869966
XGBoost	Bcap37	0.977273	0.971751	0.977273	0.977273	0.977273	0.952784	0.997202		0.785714	0.727273	0.775401	0.727273	0.823529	0.550802	0.796791		0.703704	0.636364	0.693182	0.636364	0.75	0.386364	0.698864
	BT-20	1	1	1	1	1	1	1		0.827586	0.848485	0.828431	0.823529	0.833333	0.650516	0.901961		0.793103	0.833333	0.77451	0.882353	0.666667	0.568887	0.877451
	BT-474	0.969183	0.980545	0.948392	0.984375	0.912409	0.906635	0.994825		0.876543	0.923077	0.792279	0.9375	0.647059	0.612809	0.897059		0.82716	0.890625	0.73943	0.890625	0.588235	0.47886	0.872243
	BT-549	0.997886	0.998433	0.997593	0.998433	0.996753	0.995186	0.999985		0.79661	0.857143	0.739474	0.9	0.578947	0.513952	0.816447		0.788136	0.852071	0.726316	0.9	0.552632	0.491233	0.672368
	HBL-100	0.996047	0.996587	0.996599	0.993197	1	0.991925	0.999968		0.71875	0.742857	0.718254	0.722222	0.714286	0.433933	0.857143		0.774194	0.8	0.773504	0.777778	0.769231	0.542392	0.811966
	HS-578T	0.989333	0.992647	0.983732	0.99631	0.971154	0.973318	0.999645		0.808511	0.876712	0.701357	0.941176	0.461538	0.479327	0.821267		0.787234	0.857143	0.710407	0.882353	0.538462	0.444584	0.78733
	MCF-7	0.846141	0.861995	0.843739	0.865497	0.821982	0.688201	0.928962		0.748809	0.776634	0.74412	0.786634	0.701607	0.490011	0.830265		0.74983	0.777205	0.745344	0.786021	0.704667	0.492233	0.827634
	MDA-MB-231	0.911962	0.932246	0.897262	0.950946	0.843577	0.808	0.973474		0.797321	0.846725	0.766662	0.878151	0.655172	0.551846	0.86189		0.79375	0.842536	0.766517	0.865546	0.667488	0.545929	0.864482
	MDA-MB-361	0.989796	0.992167	0.992228	0.984456	1	0.977782	0.999667		0.837838	0.875	0.822115	0.875	0.769231	0.644231	0.916667		0.861111	0.893617	0.854167	0.875	0.833333	0.695182	0.951389
	MDA-MB-435	0.981848	0.988427	0.965577	0.994706	0.936449	0.946775	0.9981		0.821782	0.891566	0.671832	0.940678	0.402985	0.41695	0.871553		0.838284	0.900609	0.709145	0.940678	0.477612	0.483755	0.86896
	MDA-MB-453	0.994318	0.994475	0.994314	0.994475	0.994152	0.988627	0.999935		0.681818	0.695652	0.681818	0.727273	0.636364	0.365148	0.842975		0.795455	0.780488	0.795455	0.727273	0.863636	0.596481	0.871901
	MDA-MB-468	0.977974	0.985778	0.957516	0.995895	0.919137	0.937937	0.998548		0.879397	0.924051	0.788774	0.960526	0.617021	0.644321	0.890468		0.863636	0.914286	0.767162	0.947368	0.586957	0.591532	0.889874
	SK-BR-3	0.972856	0.982157	0.951221	0.994253	0.908189	0.926688	0.996193		0.857143	0.909657	0.754773	0.960526	0.54902	0.591844	0.883256		0.841584	0.898089	0.753816	0.927632	0.58	0.549753	0.859737
	T-47D	0.942185	0.959666	0.916237	0.980671	0.851802	0.860247	0.987792		0.761146	0.838013	0.680271	0.881818	0.478723	0.394728	0.83119		0.824281	0.880694	0.757063	0.922727	0.591398	0.558273	0.86696
aACC: Accuracy. bF1: F1-measure. cBA: Balanced accuracy. dSE:Sensitivity. eSP:Specificity. fMCC:Matthews correlation coefficient. gAUC:The area under receiver operating characteristic.

## Sheet: Table S4
Table S4. The performance results of models based on MACCS keys.
Methods	Cell lines	Training set								Validation set								Test set
		ACCa	F1b	BAc	SEd	SPe	MCCf	AUCg		ACC	F1	BA	SE	SP	MCC	AUC		ACC	F1	BA	SE	SP	MCC	AUC
DNN	Bcap37	0.736364	0.650602	0.715909	0.613636	0.818182	0.442219	0.80953		0.607143	0.421053	0.564171	0.363636	0.764706	0.138749	0.780749		0.740741	0.695652	0.738636	0.727273	0.75	0.47194	0.823864
	BT-20	0.876068	0.893773	0.873091	0.890511	0.85567	0.745089	0.956355		0.793103	0.8125	0.79902	0.764706	0.833333	0.589434	0.887255		0.758621	0.8	0.745098	0.823529	0.666667	0.497568	0.745098
	BT-474	0.884438	0.929178	0.779739	0.960938	0.59854	0.627313	0.916365		0.851852	0.913043	0.668658	0.984375	0.352941	0.488863	0.863971		0.814815	0.883721	0.710018	0.890625	0.529412	0.429621	0.865809
	BT-549	0.881607	0.913846	0.855128	0.931034	0.779221	0.726126	0.943212		0.728814	0.802469	0.682566	0.8125	0.552632	0.370534	0.754112		0.762712	0.825	0.728289	0.825	0.631579	0.456579	0.742105
	HBL-100	0.794466	0.823129	0.788923	0.823129	0.754717	0.577846	0.889905		0.71875	0.780488	0.694444	0.888889	0.5	0.429082	0.825397		0.645161	0.702703	0.630342	0.722222	0.538462	0.264092	0.700855
	HS-578T	0.866667	0.913194	0.783317	0.97048	0.596154	0.651035	0.935123		0.765957	0.857143	0.600679	0.970588	0.230769	0.322786	0.780543		0.851064	0.90411	0.754525	0.970588	0.538462	0.60589	0.757919
	MCF-7	0.856353	0.873776	0.851491	0.89554	0.807442	0.708479	0.935787		0.766508	0.796801	0.759302	0.824647	0.693956	0.524786	0.845906		0.755616	0.7877	0.748048	0.816677	0.679419	0.502414	0.839305
	MDA-MB-231	0.898125	0.921691	0.881841	0.94131	0.822372	0.777523	0.962259		0.794643	0.844595	0.76403	0.87535	0.652709	0.545983	0.856144		0.804464	0.850716	0.778108	0.87395	0.682266	0.569672	0.863639
	MDA-MB-361	0.94898	0.96144	0.939902	0.968912	0.910891	0.886306	0.988714		0.864865	0.901961	0.825321	0.958333	0.692308	0.699418	0.907051		0.888889	0.913043	0.895833	0.875	0.916667	0.765532	0.961806
	MDA-MB-435	0.89604	0.93485	0.818747	0.95712	0.680374	0.682914	0.945879		0.834983	0.897541	0.717714	0.927966	0.507463	0.482976	0.843157		0.80198	0.877551	0.664464	0.911017	0.41791	0.370748	0.83326
	MDA-MB-453	0.857955	0.855491	0.859132	0.81768	0.900585	0.719381	0.928193		0.818182	0.809524	0.818182	0.772727	0.863636	0.63901	0.919421		0.75	0.731707	0.75	0.681818	0.818182	0.504715	0.822314
	MDA-MB-468	0.908748	0.941977	0.843007	0.966338	0.719677	0.734166	0.9503		0.879397	0.924051	0.788774	0.960526	0.617021	0.644321	0.870241		0.843434	0.900958	0.746424	0.927632	0.565217	0.53395	0.872855
	SK-BR-3	0.858112	0.911128	0.747017	0.96798	0.526055	0.590251	0.925291		0.812808	0.882716	0.686081	0.940789	0.431373	0.448739	0.830173		0.816832	0.885449	0.690395	0.940789	0.44	0.455945	0.833553
	T-47D	0.863238	0.907272	0.802076	0.953951	0.6502	0.660609	0.94006		0.796178	0.864407	0.708317	0.927273	0.489362	0.47933	0.809816		0.817891	0.877419	0.743206	0.927273	0.55914	0.539039	0.852297
KNN	Bcap37	0.977273	0.971098	0.973485	0.954545	0.992424	0.95277	0.998838		0.678571	0.608696	0.671123	0.636364	0.705882	0.33776	0.794118		0.777778	0.75	0.784091	0.818182	0.75	0.558738	0.801136
	BT-20	1	1	1	1	1	1	1		0.862069	0.882353	0.857843	0.882353	0.833333	0.715686	0.916667		0.793103	0.833333	0.77451	0.882353	0.666667	0.568887	0.806373
	BT-474	0.995378	0.997073	0.991724	0.998047	0.985401	0.986095	0.991724		0.91358	0.947368	0.815717	0.984375	0.647059	0.723814	0.815717		0.790123	0.868217	0.672794	0.875	0.470588	0.353473	0.672794
	BT-549	0.990486	0.992919	0.991267	0.989028	0.993506	0.978497	0.999768		0.813559	0.8625	0.786513	0.8625	0.710526	0.573026	0.867763		0.720339	0.792453	0.683224	0.7875	0.578947	0.364001	0.704276
	HBL-100	0.988142	0.989899	0.985849	1	0.971698	0.97584	0.985849		0.71875	0.769231	0.702381	0.833333	0.571429	0.42276	0.702381		0.741935	0.789474	0.724359	0.833333	0.615385	0.462775	0.724359
	HS-578T	0.986667	0.990689	0.990775	0.98155	1	0.967742	0.999556		0.808511	0.873239	0.725113	0.911765	0.538462	0.492086	0.80543		0.829787	0.885714	0.763575	0.911765	0.615385	0.556926	0.7681
	MCF-7	0.848055	0.864535	0.844922	0.873314	0.81653	0.691767	0.931873		0.771954	0.7966	0.76793	0.804414	0.731446	0.537298	0.852404		0.76821	0.795434	0.76281	0.811772	0.713849	0.52888	0.846911
	MDA-MB-231	0.848583	0.883289	0.82934	0.899615	0.759066	0.668883	0.931439		0.800893	0.848608	0.77265	0.87535	0.669951	0.560885	0.853614		0.8125	0.855769	0.789723	0.872549	0.706897	0.589084	0.872421
	MDA-MB-361	0.993197	0.994819	0.992459	0.994819	0.990099	0.984918	0.992459		0.837838	0.88	0.804487	0.916667	0.692308	0.636053	0.804487		0.861111	0.893617	0.854167	0.875	0.833333	0.695182	0.854167
	MDA-MB-435	0.871287	0.920327	0.766692	0.953944	0.579439	0.597737	0.924548		0.834983	0.899598	0.690994	0.949153	0.432836	0.463448	0.850746		0.821782	0.890688	0.68252	0.932203	0.432836	0.426007	0.852802
	MDA-MB-453	0.991477	0.991736	0.99139	0.994475	0.988304	0.982954	0.99139		0.795455	0.8	0.795455	0.818182	0.772727	0.59152	0.795455		0.818182	0.833333	0.818182	0.909091	0.727273	0.64715	0.818182
	MDA-MB-468	0.987413	0.99177	0.985229	0.989327	0.981132	0.965085	0.998171		0.879397	0.922078	0.818169	0.934211	0.702128	0.656693	0.891237		0.888889	0.928105	0.83667	0.934211	0.73913	0.683989	0.902603
	SK-BR-3	0.973473	0.98218	0.974046	0.972906	0.975186	0.930975	0.997542		0.82266	0.882353	0.757804	0.888158	0.627451	0.522599	0.841202		0.79703	0.863787	0.737632	0.855263	0.62	0.46624	0.801908
	T-47D	0.974482	0.981704	0.973375	0.976123	0.970628	0.939715	0.973375		0.738854	0.816964	0.676547	0.831818	0.521277	0.362618	0.676547		0.801917	0.862222	0.747361	0.881818	0.612903	0.512166	0.747361
NB	Bcap37	0.681818	0.635417	0.683712	0.693182	0.674242	0.360538	0.767347		0.714286	0.666667	0.716578	0.727273	0.705882	0.424177	0.721925		0.62963	0.615385	0.644886	0.727273	0.5625	0.286535	0.795455
	BT-20	0.67094	0.709434	0.667808	0.686131	0.649485	0.332147	0.790503		0.689655	0.666667	0.723039	0.529412	0.916667	0.462221	0.79902		0.724138	0.733333	0.740196	0.647059	0.833333	0.475751	0.808824
	BT-474	0.744222	0.82227	0.736314	0.75	0.722628	0.404432	0.809513		0.703704	0.79661	0.661305	0.734375	0.588235	0.278685	0.744485		0.728395	0.816667	0.67693	0.765625	0.588235	0.311948	0.766544
	BT-549	0.67019	0.75	0.636252	0.733542	0.538961	0.266823	0.710423		0.652542	0.738854	0.6125	0.725	0.5	0.220791	0.671546		0.567797	0.666667	0.529276	0.6375	0.421053	0.0563269	0.536842
	HBL-100	0.786561	0.811189	0.786067	0.789116	0.783019	0.567349	0.866866		0.6875	0.736842	0.674603	0.777778	0.571429	0.35783	0.805556		0.612903	0.647059	0.613248	0.611111	0.615385	0.223647	0.683761
	HS-578T	0.698667	0.781431	0.661155	0.745387	0.576923	0.303748	0.73061		0.617021	0.71875	0.569005	0.676471	0.461538	0.128479	0.653846		0.680851	0.769231	0.636878	0.735294	0.538462	0.258424	0.751131
	MCF-7	0.579525	0.605603	0.579284	0.581468	0.5771	0.157637	0.609644		0.588836	0.611825	0.589474	0.583691	0.595256	0.177862	0.625243		0.574881	0.604872	0.573485	0.586143	0.560826	0.146199	0.606038
	MDA-MB-231	0.5973	0.669657	0.580876	0.640855	0.520897	0.157712	0.631877		0.60625	0.680203	0.587052	0.656863	0.517241	0.170414	0.638229		0.598214	0.66863	0.583937	0.635854	0.53202	0.163249	0.635844
	MDA-MB-361	0.789116	0.825843	0.801621	0.761658	0.841584	0.57637	0.8935		0.783784	0.833333	0.762821	0.833333	0.692308	0.525641	0.855769		0.777778	0.809524	0.8125	0.708333	0.916667	0.589256	0.9375
	MDA-MB-435	0.730198	0.824099	0.627935	0.811011	0.44486	0.246575	0.69834		0.735974	0.828326	0.632779	0.817797	0.447761	0.257708	0.70535		0.739274	0.836439	0.592145	0.855932	0.328358	0.19704	0.691342
	MDA-MB-453	0.755682	0.767568	0.754838	0.78453	0.725146	0.510866	0.803738		0.681818	0.666667	0.681818	0.636364	0.727273	0.365148	0.747934		0.681818	0.681818	0.681818	0.681818	0.681818	0.363636	0.82438
	MDA-MB-468	0.738829	0.825116	0.664692	0.803777	0.525606	0.312735	0.765261		0.733668	0.821549	0.656635	0.802632	0.510638	0.299232	0.753779		0.712121	0.808081	0.622998	0.789474	0.456522	0.234642	0.736842
	SK-BR-3	0.656385	0.741291	0.657611	0.655172	0.66005	0.275756	0.725519		0.610837	0.712727	0.57727	0.644737	0.509804	0.137168	0.640157		0.643564	0.735294	0.628947	0.657895	0.6	0.226648	0.690263
	T-47D	0.658293	0.748311	0.613806	0.724275	0.503338	0.219332	0.667165		0.649682	0.740566	0.606818	0.713636	0.5	0.205087	0.696228		0.629393	0.7277	0.578079	0.704545	0.451613	0.15045	0.647605
RF	Bcap37	0.936364	0.917647	0.92803	0.886364	0.969697	0.867334	0.989196		0.678571	0.608696	0.671123	0.636364	0.705882	0.33776	0.783422		0.777778	0.75	0.784091	0.818182	0.75	0.558738	0.849432
	BT-20	1	1	1	1	1	1	1		0.862069	0.882353	0.857843	0.882353	0.833333	0.715686	0.901961		0.758621	0.810811	0.732843	0.882353	0.583333	0.495761	0.801471
	BT-474	0.996918	0.998047	0.995374	0.998047	0.992701	0.990748	0.999693		0.901235	0.940299	0.786305	0.984375	0.588235	0.680657	0.949449		0.876543	0.923077	0.792279	0.9375	0.647059	0.612809	0.899816
	BT-549	0.990486	0.992974	0.987069	0.996865	0.977273	0.978316	0.999394		0.79661	0.857143	0.739474	0.9	0.578947	0.513952	0.858059		0.737288	0.814371	0.675	0.85	0.5	0.37159	0.707237
	HBL-100	0.988142	0.989761	0.98848	0.986395	0.990566	0.975709	0.999711		0.71875	0.769231	0.702381	0.833333	0.571429	0.42276	0.859127		0.709677	0.769231	0.685897	0.833333	0.538462	0.392466	0.801282
	HS-578T	0.970667	0.979592	0.967854	0.97417	0.961538	0.927646	0.996381		0.787234	0.852941	0.734163	0.852941	0.615385	0.468326	0.813348		0.893617	0.927536	0.855204	0.941176	0.769231	0.728776	0.819005
	MCF-7	0.905285	0.915605	0.902785	0.925429	0.880142	0.807958	0.966533		0.79646	0.820528	0.791295	0.838136	0.744453	0.586395	0.874158		0.784207	0.810972	0.778054	0.833844	0.722265	0.561169	0.866096
	MDA-MB-231	0.970989	0.977324	0.966986	0.981605	0.952366	0.937135	0.997554		0.799107	0.846835	0.771781	0.871148	0.672414	0.557496	0.87385		0.825893	0.867797	0.799164	0.896359	0.70197	0.616329	0.885133
	MDA-MB-361	0.993197	0.994819	0.992459	0.994819	0.990099	0.984918	0.999179		0.783784	0.846154	0.727564	0.916667	0.538462	0.50642	0.932692		0.916667	0.938776	0.895833	0.958333	0.833333	0.810163	0.993056
	MDA-MB-435	0.97896	0.986597	0.960375	0.993647	0.927103	0.938221	0.99799		0.821782	0.892	0.666487	0.944915	0.38806	0.412639	0.897957		0.831683	0.897796	0.683531	0.949153	0.41791	0.450014	0.873419
	MDA-MB-453	0.991477	0.99169	0.991551	0.98895	0.994152	0.982959	0.999855		0.818182	0.809524	0.818182	0.772727	0.863636	0.63901	0.936983		0.75	0.765957	0.75	0.818182	0.681818	0.504715	0.871901
	MDA-MB-468	0.987413	0.99181	0.979606	0.994253	0.96496	0.964691	0.99903		0.879397	0.924051	0.788774	0.960526	0.617021	0.644321	0.923082		0.878788	0.924528	0.777031	0.967105	0.586957	0.635667	0.935069
	SK-BR-3	0.973473	0.982413	0.960763	0.986043	0.935484	0.928568	0.996557		0.832512	0.892405	0.738326	0.927632	0.54902	0.524751	0.876548		0.80198	0.870968	0.714079	0.888158	0.54	0.447668	0.850461
	T-47D	0.980463	0.986123	0.974189	0.989767	0.958611	0.953201	0.997696		0.754777	0.834409	0.669632	0.881818	0.457447	0.375238	0.827055		0.805112	0.869379	0.724804	0.922727	0.526882	0.503695	0.886315
SVM	Bcap37	0.977273	0.971429	0.975379	0.965909	0.984848	0.952605	0.993242		0.714286	0.666667	0.716578	0.727273	0.705882	0.424177	0.791444		0.814815	0.761905	0.801136	0.727273	0.875	0.612809	0.784091
	BT-20	0.897436	0.913043	0.892844	0.919708	0.865979	0.788182	0.951313		0.827586	0.848485	0.828431	0.823529	0.833333	0.650516	0.818627		0.793103	0.833333	0.77451	0.882353	0.666667	0.568887	0.818627
	BT-474	0.913713	0.947269	0.819678	0.982422	0.656934	0.72567	0.959277		0.876543	0.926471	0.727482	0.984375	0.470588	0.589526	0.900735		0.82716	0.893939	0.696232	0.921875	0.470588	0.435399	0.872243
	BT-549	0.862579	0.903846	0.811632	0.95768	0.665584	0.678836	0.945981		0.762712	0.840909	0.673026	0.925	0.421053	0.415176	0.762007		0.79661	0.857143	0.739474	0.9	0.578947	0.513952	0.688816
	HBL-100	0.885375	0.901695	0.881626	0.904762	0.858491	0.764283	0.95267		0.78125	0.820513	0.765873	0.888889	0.642857	0.555391	0.853175		0.645161	0.702703	0.630342	0.722222	0.538462	0.264092	0.752137
	HS-578T	0.869333	0.914783	0.788124	0.97048	0.605769	0.658484	0.948712		0.765957	0.853333	0.624434	0.941176	0.307692	0.333591	0.71267		0.851064	0.901408	0.778281	0.941176	0.615385	0.608307	0.794118
	MCF-7	0.933197	0.939976	0.932088	0.942137	0.922039	0.864681	0.97823		0.789993	0.812974	0.786002	0.822195	0.749809	0.573804	0.854533		0.789312	0.81316	0.784781	0.825874	0.743688	0.572134	0.852447
	MDA-MB-231	0.90906	0.930288	0.892606	0.952698	0.832514	0.801573	0.96787		0.807143	0.854839	0.775427	0.890756	0.660099	0.573114	0.87249		0.8125	0.856557	0.787598	0.878151	0.697044	0.58789	0.875981
	MDA-MB-361	0.935374	0.950904	0.927179	0.953368	0.90099	0.856403	0.976145		0.837838	0.884615	0.786859	0.958333	0.615385	0.638374	0.839744		0.888889	0.916667	0.875	0.916667	0.833333	0.75	0.972222
	MDA-MB-435	0.97896	0.986618	0.958365	0.995236	0.921495	0.938223	0.980777		0.828383	0.896414	0.670725	0.95339	0.38806	0.432791	0.838034		0.834983	0.899194	0.696338	0.944915	0.447761	0.46699	0.799994
	MDA-MB-453	0.886364	0.888889	0.886433	0.883978	0.888889	0.772667	0.956657		0.772727	0.772727	0.772727	0.772727	0.772727	0.545455	0.892562		0.772727	0.791667	0.772727	0.863636	0.681818	0.5547	0.857438
	MDA-MB-468	0.950283	0.968337	0.902903	0.99179	0.814016	0.85816	0.985995		0.894472	0.933754	0.805991	0.973684	0.638298	0.690602	0.893197		0.868687	0.917722	0.770452	0.953947	0.586957	0.605703	0.875858
	SK-BR-3	0.859346	0.912375	0.742857	0.974548	0.511166	0.594176	0.930523		0.842365	0.90184	0.718847	0.967105	0.470588	0.542505	0.849265		0.836634	0.898462	0.710263	0.960526	0.46	0.517581	0.816579
	T-47D	0.920654	0.945103	0.884788	0.973849	0.795728	0.807053	0.968528		0.77707	0.850427	0.691634	0.904545	0.478723	0.430805	0.788588		0.808307	0.867257	0.751906	0.890909	0.612903	0.525697	0.865787
XGBoost	Bcap37	0.977273	0.971751	0.977273	0.977273	0.977273	0.952784	0.99746		0.75	0.72	0.762032	0.818182	0.705882	0.511891	0.700535		0.740741	0.695652	0.738636	0.727273	0.75	0.47194	0.767045
	BT-20	0.982906	0.985507	0.980886	0.992701	0.969072	0.964827	0.998645		0.862069	0.882353	0.857843	0.882353	0.833333	0.715686	0.897059		0.827586	0.857143	0.816176	0.882353	0.75	0.641863	0.833333
	BT-474	0.995378	0.997073	0.991724	0.998047	0.985401	0.986095	0.999722		0.888889	0.931298	0.800092	0.953125	0.647059	0.646394	0.928309		0.814815	0.88189	0.731618	0.875	0.588235	0.453743	0.865809
	BT-549	0.958774	0.969697	0.948444	0.978056	0.918831	0.905572	0.990794		0.788136	0.852071	0.726316	0.9	0.552632	0.491233	0.813651		0.762712	0.829268	0.714474	0.85	0.578947	0.442549	0.694079
	HBL-100	0.936759	0.945946	0.933738	0.952381	0.915094	0.869879	0.985047		0.6875	0.736842	0.674603	0.777778	0.571429	0.35783	0.795635		0.741935	0.789474	0.724359	0.833333	0.615385	0.462775	0.824786
	HS-578T	0.914667	0.942652	0.869855	0.97048	0.769231	0.781413	0.981355		0.787234	0.868421	0.63914	0.970588	0.307692	0.403724	0.751131		0.808511	0.869565	0.748869	0.882353	0.615385	0.510607	0.79638
	MCF-7	0.809718	0.831968	0.804909	0.848483	0.761335	0.613454	0.893813		0.75017	0.778916	0.744891	0.792765	0.697016	0.492347	0.828118		0.745405	0.777116	0.738699	0.79951	0.677888	0.481859	0.821063
	MDA-MB-231	0.873243	0.904054	0.848963	0.937631	0.760295	0.722048	0.947945		0.795536	0.847027	0.76048	0.887955	0.633005	0.546035	0.866578		0.791071	0.840816	0.762822	0.865546	0.660099	0.539502	0.86477
	MDA-MB-361	0.972789	0.979167	0.972195	0.974093	0.970297	0.94006	0.993151		0.810811	0.862745	0.766026	0.916667	0.615385	0.571938	0.907051		0.916667	0.93617	0.916667	0.916667	0.916667	0.817861	0.989583
	MDA-MB-435	0.945957	0.965823	0.903026	0.979884	0.826168	0.838855	0.986905		0.848185	0.907258	0.715501	0.95339	0.477612	0.512568	0.882178		0.844884	0.904665	0.718726	0.944915	0.492537	0.505917	0.857545
	MDA-MB-453	0.860795	0.865014	0.860602	0.867403	0.853801	0.721333	0.94123		0.840909	0.844444	0.840909	0.863636	0.818182	0.682524	0.88843		0.727273	0.714286	0.727273	0.681818	0.772727	0.456435	0.841942
	MDA-MB-468	0.976715	0.984855	0.964193	0.987685	0.940701	0.934588	0.996978		0.874372	0.921136	0.778135	0.960526	0.595745	0.627734	0.901316		0.89899	0.936709	0.812929	0.973684	0.652174	0.700834	0.909468
	SK-BR-3	0.931524	0.955475	0.884698	0.977833	0.791563	0.811583	0.974827		0.832512	0.892405	0.738326	0.927632	0.54902	0.524751	0.858424		0.811881	0.878981	0.713947	0.907895	0.52	0.4634	0.845263
	T-47D	0.955343	0.968575	0.937883	0.981239	0.894526	0.892371	0.991007		0.761146	0.835886	0.68941	0.868182	0.510638	0.403263	0.803385		0.827476	0.88	0.777957	0.9	0.655914	0.575516	0.876344
aACC: Accuracy. bF1: F1-measure. cBA: Balanced accuracy. dSE:Sensitivity. eSP:Specificity. fMCC:Matthews correlation coefficient. gAUC:The area under receiver operating characteristic.

## Sheet: Table S5
Table S5. The performance results of models based on Morgan fingerprints.
Methods	Cell lines	Training set								Validation set								Test set
		ACCa	F1b	BAc	SEd	SPe	MCCf	AUCg		ACC	F1	BA	SE	SP	MCC	AUC		ACC	F1	BA	SE	SP	MCC	AUC
DNN	Bcap37	0.877273	0.861538	0.890152	0.954545	0.825758	0.764822	0.955449		0.75	0.72	0.762032	0.818182	0.705882	0.511891	0.850267		0.666667	0.666667	0.690341	0.818182	0.5625	0.380682	0.681818
	BT-20	0.995726	0.996337	0.99635	0.992701	1	0.991247	0.999925		0.793103	0.8125	0.79902	0.764706	0.833333	0.589434	0.911765		0.724138	0.777778	0.703431	0.823529	0.583333	0.421586	0.823529
	BT-474	0.941448	0.962672	0.920121	0.957031	0.883212	0.827288	0.97766		0.888889	0.930233	0.821691	0.9375	0.705882	0.658062	0.88511		0.851852	0.904762	0.798254	0.890625	0.705882	0.573268	0.886029
	BT-549	0.919662	0.943114	0.883341	0.987461	0.779221	0.816859	0.984636		0.822034	0.877193	0.758224	0.9375	0.578947	0.574461	0.849342		0.754237	0.83237	0.673684	0.9	0.447368	0.397206	0.696053
	HBL-100	0.944664	0.952703	0.941856	0.959184	0.924528	0.886161	0.99047		0.71875	0.756757	0.710317	0.777778	0.642857	0.424871	0.845238		0.677419	0.722222	0.668803	0.722222	0.615385	0.337607	0.777778
	HS-578T	0.88	0.921466	0.804393	0.97417	0.634615	0.688336	0.968883		0.808511	0.88	0.677602	0.970588	0.384615	0.476125	0.807692		0.808511	0.88	0.677602	0.970588	0.384615	0.476125	0.771493
	MCF-7	0.971024	0.973867	0.970842	0.972486	0.969198	0.941358	0.996202		0.799523	0.819381	0.797093	0.819129	0.775057	0.594142	0.873435		0.797481	0.816867	0.795482	0.813611	0.777353	0.590404	0.875273
	MDA-MB-231	0.974113	0.979847	0.968844	0.988087	0.9496	0.943928	0.996942		0.808929	0.854817	0.781078	0.882353	0.679803	0.578643	0.872949		0.815179	0.857732	0.792886	0.87395	0.711823	0.59513	0.879624
	MDA-MB-361	0.935374	0.951157	0.924819	0.958549	0.891089	0.855918	0.974888		0.810811	0.872727	0.730769	1	0.461538	0.597763	0.980769		0.861111	0.897959	0.833333	0.916667	0.75	0.682242	0.96875
	MDA-MB-435	0.90429	0.941027	0.808633	0.979884	0.637383	0.704854	0.965876		0.828383	0.896414	0.670725	0.95339	0.38806	0.432791	0.873261		0.831683	0.897384	0.688876	0.944915	0.432836	0.453685	0.814982
	MDA-MB-453	0.963068	0.96338	0.963604	0.944751	0.982456	0.926893	0.99496		0.818182	0.809524	0.818182	0.772727	0.863636	0.63901	0.933884		0.727273	0.727273	0.727273	0.727273	0.727273	0.454545	0.774793
	MDA-MB-468	0.988043	0.992204	0.982828	0.992611	0.973046	0.966564	0.998983		0.874372	0.919094	0.807531	0.934211	0.680851	0.640199	0.897046		0.868687	0.915584	0.800772	0.927632	0.673913	0.621415	0.892878
	SK-BR-3	0.92227	0.94956	0.870238	0.973727	0.766749	0.785245	0.976239		0.862069	0.9125	0.764577	0.960526	0.568627	0.607575	0.900413		0.841584	0.898734	0.747105	0.934211	0.56	0.545764	0.847105
	T-47D	0.883174	0.921046	0.823571	0.971575	0.675567	0.713011	0.956686		0.764331	0.845188	0.661219	0.918182	0.404255	0.385759	0.836074		0.782748	0.854701	0.696481	0.909091	0.483871	0.442711	0.81349
KNN	Bcap37	0.995455	0.994286	0.994318	0.988636	1	0.990557	0.999957		0.75	0.666667	0.729947	0.636364	0.823529	0.46875	0.823529		0.703704	0.6	0.678977	0.545455	0.8125	0.373101	0.798295
	BT-20	1	1	1	1	1	1	1		0.758621	0.774194	0.769608	0.705882	0.833333	0.531457	0.769608		0.758621	0.810811	0.732843	0.882353	0.583333	0.495761	0.732843
	BT-474	1	1	1	1	1	1	1		0.876543	0.925373	0.749081	0.96875	0.529412	0.592161	0.749081		0.839506	0.894309	0.81204	0.859375	0.764706	0.571371	0.81204
	BT-549	0.997886	0.99843	0.998433	0.996865	1	0.995205	0.99999		0.822034	0.869565	0.792763	0.875	0.710526	0.589712	0.895066		0.70339	0.779874	0.663816	0.775	0.552632	0.325444	0.691283
	HBL-100	0.996047	0.996587	0.996599	0.993197	1	0.991925	0.999968		0.75	0.777778	0.746032	0.777778	0.714286	0.492063	0.839286		0.774194	0.810811	0.762821	0.833333	0.692308	0.532512	0.784188
	HS-578T	1	1	1	1	1	1	1		0.851064	0.90411	0.754525	0.970588	0.538462	0.60589	0.846154		0.829787	0.885714	0.763575	0.911765	0.615385	0.556926	0.762443
	MCF-7	0.99183	0.992605	0.992367	0.987508	0.997226	0.983546	0.999861		0.803608	0.823601	0.800848	0.825874	0.775822	0.60212	0.878362		0.803608	0.822625	0.801532	0.820356	0.782708	0.602663	0.873374
	MDA-MB-231	0.99509	0.996136	0.995617	0.993693	0.997541	0.989427	0.999945		0.829464	0.868729	0.808341	0.885154	0.731527	0.626533	0.882651		0.836607	0.873005	0.819787	0.880952	0.758621	0.644227	0.894239
	MDA-MB-361	0.996599	0.997403	0.997409	0.994819	1	0.992505	0.999974		0.918919	0.93617	0.919872	0.916667	0.923077	0.826601	0.967949		0.888889	0.909091	0.916667	0.833333	1	0.790569	0.934028
	MDA-MB-435	0.99505	0.996815	0.996154	0.994177	0.998131	0.985774	0.999928		0.848185	0.903766	0.763597	0.915254	0.61194	0.545622	0.88689		0.818482	0.885177	0.717809	0.898305	0.537313	0.45365	0.83288
	MDA-MB-453	0.857955	0.848485	0.860425	0.773481	0.947368	0.72919	0.946981		0.772727	0.75	0.772727	0.681818	0.863636	0.5547	0.892562		0.772727	0.75	0.772727	0.681818	0.863636	0.5547	0.774793
	MDA-MB-468	0.999371	0.999589	0.999589	0.999179	1	0.998245	0.999999		0.889447	0.929936	0.81005	0.960526	0.659574	0.676978	0.93449		0.853535	0.905537	0.783324	0.914474	0.652174	0.580382	0.898384
	SK-BR-3	0.996915	0.997945	0.997117	0.996716	0.997519	0.991777	0.999971		0.827586	0.885993	0.761094	0.894737	0.627451	0.533024	0.869647		0.836634	0.892508	0.770658	0.901316	0.64	0.552895	0.841974
	T-47D	0.997608	0.998292	0.998294	0.996589	1	0.994318	0.999986		0.786624	0.850112	0.73501	0.863636	0.606383	0.480971	0.832205		0.830671	0.879819	0.795748	0.881818	0.709677	0.593355	0.864809
NB	Bcap37	0.777273	0.687898	0.75	0.613636	0.886364	0.527941	0.871686		0.714286	0.6	0.684492	0.545455	0.823529	0.38586	0.775401		0.666667	0.571429	0.647727	0.545455	0.75	0.300623	0.71875
	BT-20	0.846154	0.85124	0.865603	0.751825	0.979381	0.724263	0.959591		0.724138	0.714286	0.752451	0.588235	0.916667	0.512495	0.833333		0.793103	0.8	0.811275	0.705882	0.916667	0.616534	0.818627
	BT-474	0.845917	0.894292	0.87294	0.826172	0.919708	0.646696	0.937956		0.777778	0.847458	0.772978	0.78125	0.764706	0.471621	0.89614		0.814815	0.871795	0.839614	0.796875	0.882353	0.581585	0.872243
	BT-549	0.869979	0.900886	0.866659	0.876176	0.857143	0.71478	0.932515		0.762712	0.822785	0.735197	0.8125	0.657895	0.464325	0.799671		0.711864	0.7875	0.670066	0.7875	0.552632	0.340132	0.680263
	HBL-100	0.909091	0.920415	0.909928	0.904762	0.915094	0.815161	0.973463		0.75	0.777778	0.746032	0.777778	0.714286	0.492063	0.815476		0.709677	0.769231	0.685897	0.833333	0.538462	0.392466	0.74359
	HS-578T	0.901333	0.930841	0.887294	0.918819	0.855769	0.759642	0.947204		0.808511	0.876712	0.701357	0.941176	0.461538	0.479327	0.785068		0.702128	0.787879	0.651584	0.764706	0.538462	0.29092	0.701357
	MCF-7	0.644796	0.651906	0.650466	0.599096	0.701837	0.299819	0.704886		0.654527	0.664241	0.659355	0.615573	0.703137	0.317202	0.712946		0.608918	0.617128	0.61402	0.56775	0.660291	0.227166	0.682382
	MDA-MB-231	0.708436	0.755268	0.709212	0.706377	0.712047	0.40484	0.779149		0.698214	0.744327	0.701681	0.689076	0.714286	0.389242	0.762343		0.701786	0.749625	0.702357	0.70028	0.704433	0.391362	0.769284
	MDA-MB-361	0.870748	0.892045	0.896835	0.813472	0.980198	0.756334	0.970066		0.864865	0.897959	0.842949	0.916667	0.769231	0.699481	0.974359		0.888889	0.913043	0.895833	0.875	0.916667	0.765532	0.958333
	MDA-MB-435	0.82632	0.885815	0.778034	0.864479	0.691589	0.526912	0.852178		0.79868	0.869936	0.715785	0.864407	0.567164	0.424931	0.792942		0.811881	0.879493	0.72426	0.881356	0.567164	0.450951	0.810935
	MDA-MB-453	0.892045	0.890173	0.893251	0.850829	0.935673	0.787724	0.941488		0.795455	0.790698	0.795455	0.772727	0.818182	0.59152	0.876033		0.727273	0.727273	0.727273	0.727273	0.727273	0.454545	0.789256
	MDA-MB-468	0.848962	0.897523	0.833062	0.86289	0.803235	0.619379	0.910601		0.819095	0.878378	0.778695	0.855263	0.702128	0.529381	0.856663		0.772727	0.847458	0.715532	0.822368	0.608696	0.406437	0.849542
	SK-BR-3	0.736582	0.794018	0.798147	0.675698	0.920596	0.516225	0.883468		0.704433	0.769231	0.750516	0.657895	0.843137	0.435511	0.825529		0.688119	0.758621	0.725658	0.651316	0.8	0.39078	0.800592
	T-47D	0.78748	0.84447	0.763783	0.822626	0.70494	0.51158	0.84989		0.735669	0.810069	0.689507	0.804545	0.574468	0.375677	0.789265		0.690096	0.767386	0.664712	0.727273	0.602151	0.311706	0.751271
RF	Bcap37	0.759091	0.618705	0.714015	0.488636	0.939394	0.496906	0.875517		0.678571	0.4	0.606952	0.272727	0.941176	0.298541	0.882353		0.703704	0.6	0.678977	0.545455	0.8125	0.373101	0.792614
	BT-20	0.944444	0.951673	0.946535	0.934307	0.958763	0.887247	0.98273		0.827586	0.864865	0.803922	0.941176	0.666667	0.647098	0.931373		0.758621	0.8	0.745098	0.823529	0.666667	0.497568	0.838235
	BT-474	1	1	1	1	1	1	1		0.876543	0.927536	0.705882	1	0.411765	0.596759	0.928768		0.82716	0.895522	0.674632	0.9375	0.411765	0.415168	0.883732
	BT-549	0.997886	0.998433	0.997593	0.998433	0.996753	0.995186	0.99999		0.847458	0.894118	0.790789	0.95	0.631579	0.638771	0.886842		0.754237	0.830409	0.680592	0.8875	0.473684	0.401757	0.697533
	HBL-100	0.996047	0.99661	0.995283	1	0.990566	0.991904	0.999968		0.78125	0.820513	0.765873	0.888889	0.642857	0.555391	0.857143		0.83871	0.871795	0.818376	0.944444	0.692308	0.672154	0.82265
	HS-578T	1	1	1	1	1	1	1		0.829787	0.894737	0.692308	1	0.384615	0.557992	0.834842		0.808511	0.873239	0.725113	0.911765	0.538462	0.492086	0.74095
	MCF-7	0.992043	0.992839	0.991855	0.993562	0.990147	0.983889	0.999768		0.813819	0.833384	0.810729	0.838749	0.782708	0.622516	0.887763		0.807692	0.82727	0.804983	0.829552	0.780413	0.610395	0.88572
	MDA-MB-231	0.99509	0.996146	0.994692	0.996146	0.993239	0.989385	0.999826		0.835714	0.876011	0.807399	0.910364	0.704433	0.637624	0.893852		0.836607	0.875932	0.810755	0.904762	0.716749	0.640208	0.904382
	MDA-MB-361	0.996599	0.997416	0.99505	1	0.990099	0.992469	0.999974		0.891892	0.923077	0.846154	1	0.692308	0.770329	0.980769		0.916667	0.93617	0.916667	0.916667	0.916667	0.817861	0.972222
	MDA-MB-435	0.99505	0.996827	0.991465	0.997882	0.985047	0.985581	0.999905		0.834983	0.900398	0.680306	0.957627	0.402985	0.45708	0.906906		0.825083	0.89336	0.679294	0.940678	0.41791	0.43067	0.865767
	MDA-MB-453	0.994318	0.994475	0.994314	0.994475	0.994152	0.988627	0.999935		0.818182	0.8	0.818182	0.727273	0.909091	0.64715	0.929752		0.75	0.744186	0.75	0.727273	0.772727	0.500517	0.85124
	MDA-MB-468	0.999371	0.99959	0.998652	1	0.997305	0.998242	0.999999		0.894472	0.933754	0.805991	0.973684	0.638298	0.690602	0.93533		0.868687	0.918239	0.762872	0.960526	0.565217	0.603178	0.923126
	SK-BR-3	0.996915	0.997947	0.996287	0.997537	0.995037	0.991752	0.999821		0.832512	0.892405	0.738326	0.927632	0.54902	0.524751	0.886416		0.821782	0.883871	0.740658	0.901316	0.58	0.503248	0.869342
	T-47D	0.997608	0.998294	0.997145	0.998294	0.995995	0.994289	0.999986		0.789809	0.860169	0.700725	0.922727	0.478723	0.461861	0.861944		0.840256	0.892241	0.77153	0.940909	0.602151	0.598661	0.884971
SVM	Bcap37	0.995455	0.994286	0.994318	0.988636	1	0.990557	0.999957		0.785714	0.7	0.759358	0.636364	0.882353	0.542441	0.743316		0.740741	0.631579	0.710227	0.545455	0.875	0.452432	0.681818
	BT-20	0.948718	0.955882	0.948679	0.948905	0.948454	0.894804	0.989239		0.827586	0.848485	0.828431	0.823529	0.833333	0.650516	0.838235		0.689655	0.756757	0.661765	0.823529	0.5	0.344423	0.823529
	BT-474	0.98151	0.988417	0.956204	1	0.912409	0.9442	0.999458		0.876543	0.924242	0.77068	0.953125	0.588235	0.600585	0.840993		0.864198	0.914729	0.784467	0.921875	0.647059	0.581915	0.855699
	BT-549	0.939746	0.95612	0.921742	0.973354	0.87013	0.861469	0.98601		0.855932	0.899408	0.803947	0.95	0.657895	0.659738	0.850987		0.754237	0.828402	0.6875	0.875	0.5	0.406981	0.697039
	HBL-100	0.996047	0.99661	0.995283	1	0.990566	0.991904	0.999968		0.78125	0.820513	0.765873	0.888889	0.642857	0.555391	0.845238		0.741935	0.8	0.713675	0.888889	0.538462	0.464579	0.799145
	HS-578T	0.917333	0.945133	0.862812	0.98524	0.740385	0.7894	0.989959		0.808511	0.88	0.677602	0.970588	0.384615	0.476125	0.803167		0.851064	0.90411	0.754525	0.970588	0.538462	0.60589	0.825792
	MCF-7	0.979746	0.981767	0.979449	0.982143	0.976755	0.95899	0.996163		0.810075	0.830601	0.806521	0.838749	0.774292	0.614686	0.876367		0.810415	0.831059	0.806751	0.839975	0.773527	0.615319	0.871811
	MDA-MB-231	0.99509	0.99615	0.99423	0.997372	0.991088	0.989381	0.997899		0.834821	0.875253	0.806699	0.908964	0.704433	0.635678	0.875624		0.828571	0.870794	0.79914	0.906162	0.692118	0.621468	0.887296
	MDA-MB-361	0.952381	0.963542	0.949572	0.958549	0.940594	0.89502	0.979352		0.864865	0.90566	0.807692	1	0.615385	0.713641	0.967949		0.916667	0.93617	0.916667	0.916667	0.916667	0.817861	0.940972
	MDA-MB-435	0.909653	0.944289	0.817433	0.98253	0.652336	0.72263	0.98381		0.831683	0.899408	0.662155	0.966102	0.358209	0.43792	0.883506		0.825083	0.89505	0.657918	0.957627	0.358209	0.415279	0.862984
	MDA-MB-453	0.963068	0.963173	0.963765	0.939227	0.988304	0.927396	0.992569		0.863636	0.863636	0.863636	0.863636	0.863636	0.727273	0.93595		0.75	0.755556	0.75	0.772727	0.727273	0.500517	0.838843
	MDA-MB-468	0.940843	0.96243	0.886436	0.988506	0.784367	0.830206	0.989954		0.874372	0.922601	0.756089	0.980263	0.531915	0.625626	0.897116		0.858586	0.913043	0.733553	0.967105	0.5	0.566125	0.901888
	SK-BR-3	0.893276	0.93197	0.812756	0.972906	0.652605	0.699774	0.97741		0.837438	0.897833	0.722072	0.953947	0.490196	0.528636	0.875258		0.826733	0.888889	0.730526	0.921053	0.54	0.504117	0.868355
	T-47D	0.92823	0.95	0.898622	0.972143	0.8251	0.8258	0.983214		0.802548	0.868644	0.715909	0.931818	0.5	0.496798	0.856528		0.814696	0.873913	0.747141	0.913636	0.580645	0.534146	0.872043
XGBoost	Bcap37	0.981818	0.977011	0.979167	0.965909	0.992424	0.962151	0.997503		0.75	0.666667	0.729947	0.636364	0.823529	0.46875	0.754011		0.703704	0.666667	0.707386	0.727273	0.6875	0.407879	0.744318
	BT-20	0.888889	0.901515	0.893069	0.868613	0.917526	0.777413	0.966025		0.793103	0.823529	0.786765	0.823529	0.75	0.573529	0.867647		0.758621	0.810811	0.732843	0.882353	0.583333	0.495761	0.740196
	BT-474	0.996918	0.998051	0.992701	1	0.985401	0.990741	0.999986		0.876543	0.923077	0.792279	0.9375	0.647059	0.612809	0.884191		0.802469	0.878788	0.659007	0.90625	0.411765	0.352806	0.827206
	BT-549	0.943975	0.959136	0.927396	0.974922	0.87987	0.871289	0.990753		0.813559	0.872093	0.745066	0.9375	0.552632	0.552547	0.80773		0.694915	0.783133	0.629934	0.8125	0.447368	0.273128	0.651316
	HBL-100	0.940711	0.946996	0.946348	0.911565	0.981132	0.883391	0.986523		0.71875	0.769231	0.702381	0.833333	0.571429	0.42276	0.811508		0.774194	0.8	0.773504	0.777778	0.769231	0.542392	0.775641
	HS-578T	0.890667	0.928447	0.817698	0.98155	0.653846	0.718424	0.972325		0.787234	0.868421	0.63914	0.970588	0.307692	0.403724	0.744344		0.808511	0.88	0.677602	0.970588	0.384615	0.476125	0.753394
	MCF-7	0.829206	0.846089	0.827176	0.84557	0.808781	0.654253	0.911866		0.756978	0.782582	0.75315	0.78786	0.718439	0.507206	0.829896		0.748809	0.772783	0.746248	0.769467	0.72303	0.491996	0.825738
	MDA-MB-231	0.880495	0.909521	0.856903	0.943062	0.770744	0.738266	0.950515		0.8	0.850067	0.766106	0.889356	0.642857	0.55643	0.86273		0.784821	0.83858	0.749952	0.876751	0.623153	0.522219	0.865143
	MDA-MB-361	0.982993	0.987013	0.982327	0.984456	0.980198	0.96241	0.997486		0.837838	0.884615	0.786859	0.958333	0.615385	0.638374	0.967949		0.916667	0.938776	0.895833	0.958333	0.833333	0.810163	0.975694
	MDA-MB-435	0.930281	0.956633	0.858803	0.986765	0.730841	0.789316	0.982732		0.831683	0.89901	0.667499	0.961864	0.373134	0.440475	0.881546		0.838284	0.901408	0.698457	0.949153	0.447761	0.476699	0.852612
	MDA-MB-453	0.988636	0.988889	0.988789	0.983425	0.994152	0.977325	0.999677		0.75	0.744186	0.75	0.727273	0.772727	0.500517	0.880165		0.75	0.731707	0.75	0.681818	0.818182	0.504715	0.809917
	MDA-MB-468	0.957206	0.972536	0.921477	0.988506	0.854447	0.878132	0.992624		0.884422	0.928349	0.777366	0.980263	0.574468	0.65849	0.87682		0.858586	0.91195	0.748713	0.953947	0.543478	0.570689	0.895881
	SK-BR-3	0.926589	0.952684	0.868961	0.98358	0.754342	0.797525	0.97846		0.827586	0.890966	0.715493	0.940789	0.490196	0.500595	0.86468		0.811881	0.878981	0.713947	0.907895	0.52	0.4634	0.848158
	T-47D	0.927432	0.949752	0.893454	0.977828	0.809079	0.823969	0.98316		0.802548	0.868085	0.718956	0.927273	0.510638	0.497853	0.856431		0.792332	0.860215	0.71261	0.909091	0.516129	0.471226	0.820797
aACC: Accuracy. bF1: F1-measure. cBA: Balanced accuracy. dSE:Sensitivity. eSP:Specificity. fMCC:Matthews correlation coefficient. gAUC:The area under receiver operating characteristic.

## Sheet: Table S6
Table S6. The performance results of models based on PharmacoPFP.
Methods	Cell lines	Training set								Validation set								Test set
		ACCa	F1b	BAc	SEd	SPe	MCCf	AUCg		ACC	F1	BA	SE	SP	MCC	AUC		ACC	F1	BA	SE	SP	MCC	AUC
DNN	Bcap37	0.85	0.825397	0.856061	0.886364	0.825758	0.700081	0.930441		0.785714	0.75	0.791444	0.818182	0.764706	0.570806	0.820856		0.777778	0.75	0.784091	0.818182	0.75	0.558738	0.78125
	BT-20	0.67094	0.747541	0.637708	0.832117	0.443299	0.301515	0.757581		0.862069	0.888889	0.845588	0.941176	0.75	0.716188	0.921569		0.551724	0.648649	0.519608	0.705882	0.333333	0.0417483	0.509804
	BT-474	0.932203	0.958724	0.842089	0.998047	0.686131	0.789856	0.984225		0.901235	0.941176	0.764706	1	0.529412	0.685994	0.935662		0.802469	0.884058	0.59421	0.953125	0.235294	0.27307	0.808824
	BT-549	0.831924	0.882309	0.77715	0.934169	0.62013	0.602847	0.912953		0.788136	0.853801	0.719408	0.9125	0.526316	0.488109	0.799671		0.711864	0.8	0.635526	0.85	0.421053	0.297708	0.681579
	HBL-100	0.905138	0.92	0.898633	0.938776	0.858491	0.80458	0.969837		0.78125	0.810811	0.77381	0.833333	0.714286	0.553134	0.863095		0.774194	0.810811	0.762821	0.833333	0.692308	0.532512	0.794872
	HS-578T	0.845333	0.901361	0.73893	0.97786	0.5	0.591641	0.905336		0.851064	0.906667	0.730769	1	0.461538	0.618659	0.837104		0.808511	0.876712	0.701357	0.941176	0.461538	0.479327	0.766968
	MCF-7	0.900477	0.910421	0.899178	0.910944	0.887412	0.79847	0.967084		0.766508	0.790086	0.763405	0.791539	0.735272	0.527055	0.846535		0.770592	0.794887	0.766856	0.800736	0.732976	0.534761	0.850545
	MDA-MB-231	0.934166	0.948544	0.927179	0.952698	0.901659	0.857252	0.983676		0.815179	0.856945	0.795011	0.868347	0.721675	0.596449	0.866602		0.808036	0.849123	0.793128	0.847339	0.738916	0.585332	0.868096
	MDA-MB-361	0.928571	0.944882	0.926717	0.932642	0.920792	0.844069	0.974606		0.891892	0.92	0.863782	0.958333	0.769231	0.759916	0.964744		0.833333	0.869565	0.833333	0.833333	0.833333	0.644658	0.947917
	MDA-MB-435	0.851485	0.912366	0.6736	0.992059	0.35514	0.517507	0.942931		0.808581	0.888889	0.58854	0.983051	0.19403	0.319343	0.818967		0.811881	0.889749	0.606691	0.974576	0.238806	0.341261	0.816247
	MDA-MB-453	0.90625	0.907042	0.90674	0.889503	0.923977	0.813204	0.965106		0.818182	0.809524	0.818182	0.772727	0.863636	0.63901	0.857438		0.727273	0.73913	0.727273	0.772727	0.681818	0.456435	0.858471
	MDA-MB-468	0.905601	0.941315	0.811902	0.987685	0.636119	0.723591	0.959267		0.864322	0.916923	0.734812	0.980263	0.489362	0.591851	0.87493		0.843434	0.905199	0.693364	0.973684	0.413043	0.50971	0.875572
	SK-BR-3	0.892659	0.925831	0.893704	0.891626	0.895782	0.739771	0.960674		0.842365	0.892617	0.810049	0.875	0.745098	0.598485	0.871775		0.79703	0.857143	0.784605	0.809211	0.76	0.521766	0.878289
	T-47D	0.804226	0.874199	0.692545	0.969869	0.41522	0.500348	0.888835		0.732484	0.830645	0.595841	0.936364	0.255319	0.269161	0.811847		0.782748	0.859504	0.671652	0.945455	0.397849	0.431749	0.8065
KNN	Bcap37	0.895455	0.867052	0.888258	0.852273	0.924242	0.781271	0.948691		0.75	0.666667	0.729947	0.636364	0.823529	0.46875	0.831551		0.777778	0.7	0.755682	0.636364	0.875	0.533002	0.795455
	BT-20	0.970085	0.974359	0.969938	0.970803	0.969072	0.938499	0.969938		0.758621	0.774194	0.769608	0.705882	0.833333	0.531457	0.769608		0.724138	0.789474	0.691176	0.882353	0.5	0.421332	0.691176
	BT-474	0.989214	0.993171	0.982472	0.994141	0.970803	0.96754	0.999579		0.851852	0.911765	0.690257	0.96875	0.411765	0.493058	0.891085		0.790123	0.875912	0.586397	0.9375	0.235294	0.235851	0.681985
	BT-549	0.98203	0.986708	0.97828	0.989028	0.967532	0.959002	0.97828		0.779661	0.841463	0.733882	0.8625	0.605263	0.482596	0.733882		0.720339	0.802395	0.655592	0.8375	0.473684	0.33038	0.655592
	HBL-100	0.889328	0.904762	0.886343	0.904762	0.867925	0.772686	0.954627		0.75	0.777778	0.746032	0.777778	0.714286	0.492063	0.833333		0.83871	0.857143	0.839744	0.833333	0.846154	0.673753	0.848291
	HS-578T	0.981333	0.986965	0.984122	0.97786	0.990385	0.954624	0.999113		0.87234	0.916667	0.792986	0.970588	0.615385	0.666155	0.813348		0.87234	0.911765	0.840498	0.911765	0.769231	0.680995	0.816742
	MCF-7	0.949834	0.953922	0.951635	0.935316	0.967955	0.899777	0.993714		0.772975	0.794706	0.770674	0.791539	0.749809	0.540835	0.835548		0.783867	0.803101	0.782612	0.793991	0.771232	0.563821	0.841306
	MDA-MB-231	0.958268	0.966684	0.961161	0.950596	0.971727	0.911825	0.995063		0.809821	0.851153	0.793466	0.852941	0.73399	0.587878	0.861431		0.80625	0.847505	0.791727	0.844538	0.738916	0.581935	0.851392
	MDA-MB-361	0.982993	0.987013	0.982327	0.984456	0.980198	0.96241	0.982327		0.891892	0.92	0.863782	0.958333	0.769231	0.759916	0.863782		0.833333	0.875	0.8125	0.875	0.75	0.625	0.8125
	MDA-MB-435	0.875	0.918174	0.843431	0.899947	0.786916	0.656416	0.932461		0.79868	0.868817	0.726474	0.855932	0.597015	0.437529	0.830793		0.811881	0.878465	0.734948	0.872881	0.597015	0.462667	0.808658
	MDA-MB-453	0.985795	0.986226	0.985703	0.98895	0.982456	0.971579	0.985703		0.772727	0.761905	0.772727	0.727273	0.818182	0.547723	0.772727		0.75	0.77551	0.75	0.863636	0.636364	0.513436	0.75
	MDA-MB-468	0.977974	0.985579	0.973449	0.981938	0.96496	0.939093	0.973449		0.869347	0.915584	0.804241	0.927632	0.680851	0.627946	0.804241		0.878788	0.92	0.845252	0.907895	0.782609	0.671198	0.845252
	SK-BR-3	0.954966	0.970119	0.936825	0.972906	0.900744	0.878817	0.936825		0.837438	0.894569	0.754644	0.921053	0.588235	0.545296	0.754644		0.772277	0.846667	0.707763	0.835526	0.58	0.405208	0.707763
	T-47D	0.980861	0.986278	0.98099	0.980671	0.981308	0.954831	0.998391		0.770701	0.842795	0.699275	0.877273	0.521277	0.42615	0.812282		0.821086	0.874439	0.776515	0.886364	0.666667	0.564141	0.837317
NB	Bcap37	0.745455	0.685393	0.736742	0.693182	0.780303	0.471782	0.784737		0.607143	0.56	0.612299	0.636364	0.588235	0.219382	0.676471		0.703704	0.692308	0.721591	0.818182	0.625	0.43823	0.803977
	BT-20	0.705128	0.716049	0.71958	0.635036	0.804124	0.434622	0.804951		0.689655	0.689655	0.710784	0.588235	0.833333	0.421569	0.882353		0.482759	0.545455	0.473039	0.529412	0.416667	-0.0534006	0.529412
	BT-474	0.74114	0.826446	0.686245	0.78125	0.591241	0.332545	0.813776		0.777778	0.854839	0.70818	0.828125	0.588235	0.3869	0.784007		0.679012	0.783333	0.602482	0.734375	0.470588	0.180687	0.710478
	BT-549	0.655391	0.72651	0.642913	0.678683	0.607143	0.271888	0.700479		0.542373	0.614286	0.545066	0.5375	0.552632	0.0842411	0.566447		0.728814	0.792208	0.710197	0.7625	0.657895	0.406211	0.668421
	HBL-100	0.671937	0.698182	0.675587	0.653061	0.698113	0.346557	0.762675		0.6875	0.722222	0.68254	0.722222	0.642857	0.365079	0.736111		0.548387	0.611111	0.536325	0.611111	0.461538	0.0726496	0.649573
	HS-578T	0.722667	0.800766	0.683686	0.771218	0.596154	0.34959	0.761177		0.765957	0.830769	0.743213	0.794118	0.692308	0.459184	0.751131		0.680851	0.761905	0.660633	0.705882	0.615385	0.295626	0.680995
	MCF-7	0.569526	0.587718	0.57162	0.552652	0.590587	0.142399	0.599485		0.577944	0.592373	0.581108	0.552422	0.609793	0.161352	0.608396		0.576583	0.595052	0.578589	0.560392	0.596787	0.156249	0.599653
	MDA-MB-231	0.586699	0.640249	0.590193	0.577435	0.60295	0.173541	0.625037		0.584821	0.643678	0.583527	0.588235	0.578818	0.160859	0.625799		0.579464	0.628842	0.587294	0.558824	0.615764	0.167862	0.636555
	MDA-MB-361	0.761905	0.81383	0.747858	0.792746	0.70297	0.485608	0.843944		0.756757	0.830189	0.689103	0.916667	0.461538	0.438592	0.80609		0.666667	0.727273	0.666667	0.666667	0.666667	0.316228	0.800347
	MDA-MB-435	0.759901	0.849457	0.621537	0.869243	0.373832	0.259942	0.669309		0.722772	0.825726	0.570864	0.84322	0.298507	0.150502	0.606217		0.755776	0.847107	0.613427	0.868644	0.358209	0.244248	0.643341
	MDA-MB-453	0.693182	0.723077	0.690672	0.779006	0.602339	0.388073	0.791768		0.727273	0.76	0.727273	0.863636	0.590909	0.472456	0.805785		0.704545	0.734694	0.704545	0.818182	0.590909	0.420084	0.775826
	MDA-MB-468	0.662052	0.746099	0.678339	0.647783	0.708895	0.304325	0.749759		0.678392	0.764706	0.671892	0.684211	0.659574	0.298438	0.742721		0.666667	0.75	0.684354	0.651316	0.717391	0.314141	0.744065
	SK-BR-3	0.685379	0.775528	0.647018	0.723317	0.57072	0.266481	0.729961		0.610837	0.718861	0.557727	0.664474	0.45098	0.104041	0.631385		0.658416	0.761246	0.591842	0.723684	0.46	0.169692	0.671711
	T-47D	0.61563	0.702101	0.595274	0.645821	0.544726	0.177239	0.652022		0.640127	0.716792	0.633511	0.65	0.617021	0.247018	0.691248		0.552716	0.642857	0.539052	0.572727	0.505376	0.0717382	0.606891
RF	Bcap37	0.913636	0.891429	0.909091	0.886364	0.931818	0.819771	0.98119		0.75	0.666667	0.729947	0.636364	0.823529	0.46875	0.804813		0.777778	0.7	0.755682	0.636364	0.875	0.533002	0.8125
	BT-20	0.970085	0.974359	0.969938	0.970803	0.969072	0.938499	0.996012		0.793103	0.833333	0.77451	0.882353	0.666667	0.568887	0.916667		0.689655	0.769231	0.64951	0.882353	0.416667	0.344155	0.77451
	BT-474	0.938367	0.962335	0.856688	0.998047	0.715328	0.809682	0.991468		0.851852	0.913043	0.668658	0.984375	0.352941	0.488863	0.948529		0.790123	0.877698	0.564798	0.953125	0.176471	0.201511	0.845588
	BT-549	0.98203	0.986688	0.97912	0.987461	0.970779	0.959048	0.998621		0.822034	0.878613	0.751316	0.95	0.552632	0.574745	0.865789		0.745763	0.829545	0.653618	0.9125	0.394737	0.368607	0.70773
	HBL-100	0.956522	0.962457	0.956007	0.959184	0.95283	0.910846	0.994673		0.75	0.789474	0.738095	0.833333	0.642857	0.48795	0.867063		0.774194	0.810811	0.762821	0.833333	0.692308	0.532512	0.854701
	HS-578T	0.981333	0.987203	0.969309	0.99631	0.942308	0.953274	0.998829		0.87234	0.918919	0.769231	1	0.538462	0.67653	0.891403		0.851064	0.901408	0.778281	0.941176	0.615385	0.608307	0.773756
	MCF-7	0.950174	0.955201	0.949356	0.956775	0.941936	0.899085	0.992832		0.77774	0.799509	0.775194	0.798283	0.752104	0.550182	0.859287		0.789653	0.810894	0.786835	0.812385	0.761285	0.573937	0.860861
	MDA-MB-231	0.958491	0.967522	0.953872	0.970743	0.937001	0.910066	0.993857		0.816964	0.861205	0.788974	0.890756	0.687192	0.596218	0.879899		0.807143	0.851852	0.783396	0.869748	0.697044	0.576973	0.876478
	MDA-MB-361	0.982993	0.986945	0.984687	0.979275	0.990099	0.962802	0.997948		0.837838	0.884615	0.786859	0.958333	0.615385	0.638374	0.977564		0.833333	0.875	0.8125	0.875	0.75	0.625	0.9375
	MDA-MB-435	0.97071	0.981242	0.955081	0.98306	0.927103	0.914483	0.995471		0.838284	0.901804	0.693113	0.95339	0.432836	0.473507	0.838604		0.821782	0.891129	0.677176	0.936441	0.41791	0.421411	0.863838
	MDA-MB-453	0.985795	0.98615	0.985865	0.983425	0.988304	0.971588	0.999483		0.818182	0.809524	0.818182	0.772727	0.863636	0.63901	0.877066		0.727273	0.76	0.727273	0.863636	0.590909	0.472456	0.826446
	MDA-MB-468	0.983008	0.988966	0.971109	0.993432	0.948787	0.952215	0.998113		0.889447	0.93038	0.802702	0.967105	0.638298	0.675397	0.922942		0.888889	0.930818	0.79119	0.973684	0.608696	0.668156	0.920195
	SK-BR-3	0.959901	0.973459	0.94094	0.978654	0.903226	0.891711	0.993019		0.82266	0.888889	0.699174	0.947368	0.45098	0.480314	0.884546		0.80198	0.87013	0.720789	0.881579	0.56	0.454437	0.833816
	T-47D	0.980861	0.98641	0.974473	0.990335	0.958611	0.954152	0.998404		0.767516	0.846316	0.669584	0.913636	0.425532	0.397644	0.845068		0.830671	0.884532	0.767815	0.922727	0.612903	0.576107	0.87263
SVM	Bcap37	0.913636	0.887574	0.903409	0.852273	0.954545	0.81951	0.957257		0.785714	0.7	0.759358	0.636364	0.882353	0.542441	0.804813		0.814815	0.705882	0.772727	0.545455	1	0.644658	0.883523
	BT-20	0.905983	0.91791	0.907668	0.89781	0.917526	0.809149	0.957183		0.724138	0.75	0.727941	0.705882	0.75	0.449323	0.833333		0.689655	0.756757	0.661765	0.823529	0.5	0.344423	0.720588
	BT-474	0.919877	0.951036	0.82893	0.986328	0.671533	0.746673	0.962933		0.864198	0.919708	0.69807	0.984375	0.411765	0.5407	0.907169		0.82716	0.897059	0.653033	0.953125	0.352941	0.39659	0.795037
	BT-549	0.866808	0.90583	0.822324	0.949843	0.694805	0.68864	0.941385		0.838983	0.888889	0.777632	0.95	0.605263	0.617637	0.830099		0.754237	0.830409	0.680592	0.8875	0.473684	0.401757	0.704934
	HBL-100	0.901186	0.915825	0.896547	0.92517	0.867925	0.796475	0.943011		0.6875	0.736842	0.674603	0.777778	0.571429	0.35783	0.823413		0.741935	0.777778	0.735043	0.777778	0.692308	0.470085	0.858974
	HS-578T	0.848	0.901893	0.752626	0.96679	0.538462	0.597546	0.959463		0.808511	0.88	0.677602	0.970588	0.384615	0.476125	0.909502		0.829787	0.888889	0.739819	0.941176	0.538462	0.54527	0.791855
	MCF-7	0.916603	0.925082	0.915261	0.927422	0.903099	0.831056	0.965139		0.779101	0.805047	0.773836	0.821582	0.72609	0.551069	0.843531		0.785568	0.812388	0.779281	0.836297	0.722265	0.56392	0.852591
	MDA-MB-231	0.957822	0.967021	0.952884	0.970918	0.934849	0.908585	0.975668		0.807143	0.856574	0.770646	0.903361	0.637931	0.5718	0.849964		0.796429	0.847185	0.762774	0.885154	0.640394	0.548557	0.848674
	MDA-MB-361	0.931973	0.948718	0.919869	0.958549	0.881188	0.848133	0.970861		0.891892	0.92	0.863782	0.958333	0.769231	0.759916	0.967949		0.861111	0.893617	0.854167	0.875	0.833333	0.695182	0.920139
	MDA-MB-435	0.834983	0.901961	0.658993	0.97406	0.343925	0.447405	0.913355		0.79868	0.882012	0.587528	0.966102	0.208955	0.279968	0.760214		0.815182	0.891892	0.60881	0.978814	0.238806	0.355596	0.805243
	MDA-MB-453	0.985795	0.98615	0.985865	0.983425	0.988304	0.971588	0.994281		0.818182	0.789474	0.818182	0.681818	0.954545	0.661438	0.859504		0.727273	0.727273	0.727273	0.727273	0.727273	0.454545	0.808884
	MDA-MB-468	0.899308	0.937402	0.803111	0.98358	0.622642	0.703197	0.95265		0.864322	0.916409	0.742161	0.973684	0.510638	0.5916	0.867231		0.853535	0.910769	0.715103	0.973684	0.456522	0.546996	0.869279
	SK-BR-3	0.851326	0.90798	0.725068	0.97619	0.473945	0.568054	0.927794		0.82266	0.890909	0.679631	0.967105	0.392157	0.474175	0.842492		0.80198	0.876543	0.667105	0.934211	0.4	0.405604	0.834211
	T-47D	0.859649	0.904504	0.800284	0.947698	0.65287	0.651489	0.926341		0.767516	0.845666	0.672631	0.909091	0.43617	0.399667	0.797751		0.814696	0.872807	0.753348	0.904545	0.602151	0.537649	0.83001
XGBoost	Bcap37	0.913636	0.890173	0.907197	0.875	0.939394	0.819382	0.980286		0.785714	0.7	0.759358	0.636364	0.882353	0.542441	0.799465		0.814815	0.782609	0.815341	0.818182	0.8125	0.623635	0.786932
	BT-20	0.961538	0.967033	0.961133	0.963504	0.958763	0.920916	0.993491		0.758621	0.774194	0.769608	0.705882	0.833333	0.531457	0.901961		0.724138	0.777778	0.703431	0.823529	0.583333	0.421586	0.818627
	BT-474	0.978428	0.986486	0.951578	0.998047	0.905109	0.934625	0.99784		0.864198	0.917293	0.741268	0.953125	0.529412	0.553133	0.901654		0.790123	0.874074	0.607996	0.921875	0.294118	0.267377	0.832261
	BT-549	0.978858	0.984351	0.97509	0.985893	0.964286	0.951789	0.998496		0.813559	0.872093	0.745066	0.9375	0.552632	0.552547	0.79375		0.728814	0.813953	0.648026	0.875	0.421053	0.333753	0.694408
	HBL-100	0.952569	0.959459	0.949974	0.965986	0.933962	0.902442	0.993518		0.8125	0.833333	0.809524	0.833333	0.785714	0.619048	0.855159		0.806452	0.842105	0.790598	0.888889	0.692308	0.599404	0.82906
	HS-578T	0.816	0.88595	0.677157	0.98893	0.365385	0.508306	0.877501		0.765957	0.860759	0.576923	1	0.153846	0.340939	0.80543		0.787234	0.868421	0.63914	0.970588	0.307692	0.403724	0.75
	MCF-7	0.804059	0.824404	0.801029	0.828479	0.773579	0.602836	0.888622		0.737577	0.765297	0.733472	0.770693	0.696251	0.46782	0.815453		0.744384	0.768994	0.741655	0.766401	0.716909	0.48292	0.813305
	MDA-MB-231	0.864874	0.896575	0.844243	0.919587	0.7689	0.703907	0.940971		0.792857	0.843876	0.760504	0.878151	0.642857	0.541201	0.85582		0.782143	0.833561	0.754226	0.855742	0.652709	0.52039	0.855251
	MDA-MB-361	0.94898	0.96063	0.949341	0.948187	0.950495	0.888819	0.980737		0.864865	0.893617	0.860577	0.875	0.846154	0.709867	0.958333		0.833333	0.863636	0.854167	0.791667	0.916667	0.671984	0.923611
	MDA-MB-435	0.865924	0.919295	0.721717	0.979884	0.463551	0.57008	0.936102		0.821782	0.894118	0.639767	0.966102	0.313433	0.394325	0.825481		0.828383	0.897638	0.654693	0.966102	0.343284	0.42367	0.824089
	MDA-MB-453	0.985795	0.98615	0.985865	0.983425	0.988304	0.971588	0.999192		0.772727	0.761905	0.772727	0.727273	0.818182	0.547723	0.834711		0.75	0.765957	0.75	0.818182	0.681818	0.504715	0.81095
	MDA-MB-468	0.978603	0.986134	0.962613	0.992611	0.932615	0.939694	0.996744		0.864322	0.914286	0.771557	0.947368	0.595745	0.599261	0.87192		0.873737	0.920635	0.781322	0.953947	0.608696	0.622882	0.905892
	SK-BR-3	0.922887	0.95014	0.867328	0.977833	0.756824	0.786801	0.972559		0.832512	0.896341	0.699239	0.967105	0.431373	0.508947	0.859004		0.787129	0.861736	0.690789	0.881579	0.5	0.402308	0.853158
	T-47D	0.929825	0.950975	0.902442	0.970438	0.834446	0.82979	0.983124		0.77707	0.849785	0.694681	0.9	0.489362	0.432919	0.84323		0.805112	0.864143	0.752737	0.881818	0.623656	0.521308	0.849902
aACC: Accuracy. bF1: F1-measure. cBA: Balanced accuracy. dSE:Sensitivity. eSP:Specificity. fMCC:Matthews correlation coefficient. gAUC:The area under receiver operating characteristic.

## Sheet: Table S7
Table S7. The performance results of models based on molecular graph.
Methods	Cell lines	Training set								Validation set								Test set
		ACCa	F1b	BAc	SEd	SPe	MCCf	AUCg		ACC	F1	BA	SE	SP	MCC	AUC		ACC	F1	BA	SE	SP	MCC	AUC
Attentive FP	Bcap37	0.836364	0.788235	0.823864	0.761364	0.886364	0.656257	0.918259		0.821429	0.736842	0.78877	0.636364	0.941176	0.624371	0.882353		0.777778	0.727273	0.769886	0.727273	0.8125	0.539773	0.857955
	BT-20	0.867521	0.87747	0.879336	0.810219	0.948454	0.747533	0.953194		0.793103	0.8125	0.79902	0.764706	0.833333	0.589434	0.887255		0.689655	0.742857	0.67402	0.764706	0.583333	0.353273	0.735294
	BT-474	0.873652	0.922201	0.77023	0.949219	0.591241	0.594384	0.903456		0.888889	0.930233	0.821691	0.9375	0.705882	0.658062	0.901654		0.777778	0.863636	0.621783	0.890625	0.352941	0.270212	0.786765
	BT-549	0.719873	0.826457	0.575683	0.989028	0.162338	0.298075	0.741244		0.711864	0.817204	0.580263	0.95	0.210526	0.248164	0.661678		0.728814	0.831579	0.585855	0.9875	0.184211	0.319148	0.630263
	HBL-100	0.703557	0.780059	0.664645	0.904762	0.424528	0.384205	0.756835		0.6875	0.75	0.666667	0.833333	0.5	0.356753	0.718254		0.612903	0.7	0.581197	0.777778	0.384615	0.17654	0.645299
	HS-578T	0.821333	0.889256	0.68381	0.99262	0.375	0.527394	0.844167		0.765957	0.857143	0.600679	0.970588	0.230769	0.322786	0.850679		0.808511	0.88	0.677602	0.970588	0.384615	0.476125	0.830317
	MCF-7	0.917709	0.927173	0.914507	0.943516	0.885498	0.833317	0.976823		0.766848	0.794726	0.761128	0.812998	0.709258	0.525961	0.847354		0.764125	0.791704	0.758752	0.80748	0.710023	0.5206	0.844983
	MDA-MB-231	0.94711	0.958127	0.945994	0.95007	0.941918	0.886601	0.989528		0.808036	0.848911	0.793659	0.845938	0.741379	0.585789	0.868325		0.805357	0.844729	0.795808	0.830532	0.761084	0.584781	0.870108
	MDA-MB-361	0.931973	0.947644	0.929308	0.937824	0.920792	0.850967	0.980506		0.837838	0.888889	0.769231	1	0.538462	0.65633	0.948718		0.861111	0.893617	0.854167	0.875	0.833333	0.695182	0.9375
	MDA-MB-435	0.923267	0.951487	0.869711	0.96559	0.773832	0.770119	0.974795		0.834983	0.896266	0.733747	0.915254	0.552239	0.496436	0.853023		0.834983	0.897119	0.723058	0.923729	0.522388	0.487342	0.824279
	MDA-MB-453	0.875	0.887755	0.872476	0.961326	0.783626	0.759827	0.954977		0.704545	0.745098	0.704545	0.863636	0.545455	0.431517	0.822314		0.772727	0.791667	0.772727	0.863636	0.681818	0.5547	0.871901
	MDA-MB-468	0.941473	0.961234	0.935581	0.946634	0.924528	0.843635	0.988656		0.839196	0.896774	0.755109	0.914474	0.595745	0.535804	0.8736		0.883838	0.924092	0.840961	0.921053	0.76087	0.676859	0.875429
	SK-BR-3	0.822949	0.891657	0.674637	0.969622	0.379653	0.469296	0.838495		0.817734	0.888889	0.663313	0.973684	0.352941	0.455729	0.835268		0.821782	0.888199	0.700395	0.940789	0.46	0.473722	0.805263
	T-47D	0.94697	0.962546	0.93038	0.971575	0.889186	0.872229	0.986913		0.786624	0.853392	0.719778	0.886364	0.553191	0.467917	0.820116		0.789137	0.852018	0.73827	0.863636	0.612903	0.486114	0.812366
GAT	Bcap37	0.731818	0.638037	0.708333	0.590909	0.825758	0.430628	0.798382		0.714286	0.6	0.684492	0.545455	0.823529	0.38586	0.759358		0.740741	0.666667	0.724432	0.636364	0.8125	0.456716	0.767045
	BT-20	0.786325	0.829932	0.764843	0.890511	0.639175	0.555354	0.837911		0.793103	0.8125	0.79902	0.764706	0.833333	0.589434	0.862745		0.689655	0.756757	0.661765	0.823529	0.5	0.344423	0.720588
	BT-474	0.838213	0.901037	0.707673	0.933594	0.481752	0.469482	0.817647		0.814815	0.885496	0.688419	0.90625	0.470588	0.405852	0.849265		0.728395	0.833333	0.547335	0.859375	0.235294	0.105026	0.657169
	BT-549	0.792812	0.863319	0.697772	0.970219	0.425325	0.507433	0.894038		0.70339	0.804469	0.594737	0.9	0.289474	0.240875	0.711513		0.745763	0.831461	0.646711	0.925	0.368421	0.365426	0.709539
	HBL-100	0.73913	0.804734	0.703151	0.92517	0.481132	0.466067	0.820594		0.78125	0.837209	0.75	1	0.5	0.6	0.833333		0.580645	0.682927	0.542735	0.777778	0.307692	0.0963858	0.641026
	HS-578T	0.818667	0.879859	0.738256	0.918819	0.557692	0.520737	0.853002		0.851064	0.90411	0.754525	0.970588	0.538462	0.60589	0.861991		0.851064	0.901408	0.778281	0.941176	0.615385	0.608307	0.757919
	MCF-7	0.756191	0.774303	0.75655	0.753296	0.759805	0.510607	0.834963		0.732811	0.754917	0.731764	0.741263	0.722265	0.461837	0.800635		0.720899	0.742138	0.720578	0.723483	0.717674	0.439117	0.800075
	MDA-MB-231	0.743361	0.822503	0.671626	0.933602	0.40965	0.419897	0.815267		0.723214	0.809348	0.647976	0.921569	0.374384	0.365852	0.801139		0.724107	0.806996	0.655583	0.904762	0.406404	0.368523	0.769511
	MDA-MB-361	0.891156	0.913978	0.89586	0.880829	0.910891	0.770434	0.956061		0.891892	0.923077	0.846154	1	0.692308	0.770329	0.955128		0.861111	0.888889	0.875	0.833333	0.916667	0.717137	0.895833
	MDA-MB-435	0.841584	0.904048	0.694713	0.95765	0.431776	0.482933	0.892049		0.80198	0.882353	0.611023	0.95339	0.268657	0.31323	0.825702		0.838284	0.903353	0.671737	0.970339	0.373134	0.463796	0.829971
	MDA-MB-453	0.857955	0.847561	0.860586	0.767956	0.953216	0.730871	0.948176		0.75	0.744186	0.75	0.727273	0.772727	0.500517	0.828512		0.75	0.702703	0.75	0.590909	0.909091	0.52741	0.811983
	MDA-MB-468	0.893644	0.934062	0.791918	0.982759	0.601078	0.685087	0.946958		0.869347	0.919753	0.745451	0.980263	0.510638	0.608862	0.87668		0.868687	0.919255	0.747712	0.973684	0.521739	0.600446	0.875143
	SK-BR-3	0.8686	0.913939	0.807958	0.928571	0.687345	0.63794	0.912628		0.862069	0.910828	0.78412	0.940789	0.627451	0.613889	0.862745		0.811881	0.875	0.7475	0.875	0.62	0.495	0.839868
	T-47D	0.864035	0.908456	0.798045	0.96191	0.634179	0.662817	0.9291		0.751592	0.838843	0.636896	0.922727	0.351064	0.342695	0.755174		0.747604	0.830108	0.659066	0.877273	0.44086	0.352553	0.763148
GCN	Bcap37	0.790909	0.752688	0.791667	0.795455	0.787879	0.574979	0.833807		0.785714	0.727273	0.775401	0.727273	0.823529	0.550802	0.850267		0.740741	0.695652	0.738636	0.727273	0.75	0.47194	0.693182
	BT-20	0.82906	0.831933	0.851005	0.722628	0.979381	0.698236	0.965234		0.724138	0.714286	0.752451	0.588235	0.916667	0.512495	0.867647		0.655172	0.6875	0.656863	0.647059	0.666667	0.309211	0.740196
	BT-474	0.961479	0.975892	0.924798	0.988281	0.861314	0.881895	0.989636		0.888889	0.932331	0.778493	0.96875	0.588235	0.638474	0.900735		0.790123	0.870229	0.651195	0.890625	0.411765	0.325672	0.865809
	BT-549	0.87315	0.913545	0.808554	0.99373	0.623377	0.713489	0.975153		0.813559	0.876404	0.724342	0.975	0.473684	0.558791	0.889803		0.762712	0.83908	0.679934	0.9125	0.447368	0.417745	0.669408
	HBL-100	0.889328	0.908497	0.878449	0.945578	0.811321	0.772835	0.975067		0.8125	0.842105	0.801587	0.888889	0.714286	0.61807	0.84127		0.677419	0.761905	0.636752	0.888889	0.384615	0.322788	0.65812
	HS-578T	0.733333	0.844237	0.519231	1	0.0384615	0.167614	0.746133		0.723404	0.839506	0.5	1	0	nan	0.79638		0.723404	0.839506	0.5	1	0	nan	0.635747
	MCF-7	0.827589	0.838797	0.830027	0.80794	0.852114	0.656291	0.911931		0.754255	0.771084	0.755333	0.745555	0.765111	0.507894	0.833546		0.751532	0.76482	0.754476	0.727774	0.781178	0.50585	0.832825
	MDA-MB-231	0.903035	0.925376	0.887611	0.943938	0.831285	0.788372	0.968332		0.800893	0.847573	0.775307	0.868347	0.682266	0.562381	0.870476		0.797321	0.844839	0.771443	0.865546	0.67734	0.554489	0.859054
	MDA-MB-361	0.884354	0.908602	0.888319	0.875648	0.90099	0.755757	0.952239		0.837838	0.875	0.822115	0.875	0.769231	0.644231	0.929487		0.916667	0.938776	0.895833	0.958333	0.833333	0.810163	0.954861
	MDA-MB-435	0.943894	0.963791	0.925818	0.958179	0.893458	0.839552	0.980571		0.815182	0.881857	0.726379	0.885593	0.567164	0.457735	0.854731		0.828383	0.891667	0.729509	0.90678	0.552239	0.481064	0.858209
	MDA-MB-453	0.90625	0.916031	0.90367	0.994475	0.812865	0.824446	0.995816		0.704545	0.754717	0.704545	0.909091	0.5	0.448322	0.876033		0.681818	0.75	0.681818	0.954545	0.409091	0.433861	0.865702
	MDA-MB-468	0.954688	0.970636	0.929207	0.977011	0.881402	0.871837	0.986515		0.899497	0.937107	0.809281	0.980263	0.638298	0.706386	0.916713		0.848485	0.903846	0.757294	0.927632	0.586957	0.551834	0.886585
	SK-BR-3	0.877853	0.912852	0.904606	0.851396	0.957816	0.733376	0.973852		0.807882	0.860215	0.826109	0.789474	0.862745	0.584509	0.897704		0.757426	0.819188	0.785132	0.730263	0.84	0.50023	0.838553
	T-47D	0.894737	0.929108	0.834881	0.983513	0.686248	0.74424	0.968005		0.773885	0.849894	0.680222	0.913636	0.446809	0.417243	0.832157		0.779553	0.851613	0.697312	0.9	0.494624	0.437319	0.818817
MPNN	Bcap37	0.8	0.728395	0.778409	0.670455	0.886364	0.577364	0.882274		0.714286	0.555556	0.668449	0.454545	0.882353	0.37998	0.86631		0.777778	0.7	0.755682	0.636364	0.875	0.533002	0.806818
	BT-20	0.837607	0.862319	0.831214	0.868613	0.793814	0.664531	0.908044		0.793103	0.8125	0.79902	0.764706	0.833333	0.589434	0.901961		0.758621	0.810811	0.732843	0.882353	0.583333	0.495761	0.784314
	BT-474	0.938367	0.961759	0.878072	0.982422	0.773723	0.808129	0.972756		0.851852	0.910448	0.711857	0.953125	0.470588	0.503664	0.919118		0.802469	0.880597	0.637408	0.921875	0.352941	0.326672	0.847426
	BT-549	0.892178	0.921538	0.867163	0.938871	0.795455	0.750735	0.942838		0.79661	0.851852	0.760197	0.8625	0.657895	0.528094	0.809211		0.711864	0.795181	0.649342	0.825	0.473684	0.313924	0.634211
	HBL-100	0.683794	0.757576	0.651585	0.85034	0.45283	0.334367	0.714575		0.75	0.809524	0.722222	0.944444	0.5	0.509175	0.789683		0.645161	0.731707	0.608974	0.833333	0.384615	0.245784	0.700855
	HS-578T	0.722667	0.839009	0.5	1	0	nan	0.646431		0.723404	0.839506	0.5	1	0	nan	0.680995		0.723404	0.839506	0.5	1	0	nan	0.665158
	MCF-7	0.84163	0.859335	0.837947	0.871321	0.804572	0.678577	0.925294		0.75902	0.787132	0.753621	0.802575	0.704667	0.510223	0.835358		0.766167	0.790613	0.762567	0.795218	0.729916	0.525938	0.843481
	MDA-MB-231	0.879268	0.907726	0.859243	0.932376	0.786109	0.735654	0.952792		0.796429	0.845528	0.767024	0.87395	0.660099	0.550521	0.859201		0.79375	0.842105	0.767579	0.862745	0.672414	0.546597	0.850054
	MDA-MB-361	0.897959	0.919786	0.901041	0.891192	0.910891	0.783033	0.963756		0.864865	0.901961	0.825321	0.958333	0.692308	0.699418	0.961538		0.916667	0.933333	0.9375	0.875	1	0.83666	0.972222
	MDA-MB-435	0.846535	0.906392	0.711287	0.953415	0.469159	0.505292	0.894623		0.79868	0.873706	0.678377	0.894068	0.462687	0.381435	0.795282		0.808581	0.884462	0.641981	0.940678	0.343284	0.359924	0.749494
	MDA-MB-453	0.869318	0.872928	0.869213	0.872928	0.865497	0.738425	0.938629		0.795455	0.808511	0.795455	0.863636	0.727273	0.596481	0.847107		0.636364	0.666667	0.636364	0.727273	0.545455	0.27735	0.714876
	MDA-MB-468	0.935809	0.958537	0.899084	0.96798	0.830189	0.817297	0.977989		0.909548	0.941935	0.852604	0.960526	0.744681	0.740571	0.906215		0.878788	0.921053	0.830092	0.921053	0.73913	0.660183	0.857981
	SK-BR-3	0.80876	0.883283	0.652743	0.963054	0.342432	0.417217	0.789766		0.802956	0.880952	0.633901	0.973684	0.294118	0.398781	0.758772		0.806931	0.882883	0.643553	0.967105	0.32	0.405975	0.760329
	T-47D	0.815391	0.873532	0.75225	0.909039	0.595461	0.539378	0.867288		0.767516	0.843683	0.68177	0.895455	0.468085	0.406388	0.799807		0.722045	0.81128	0.634677	0.85	0.419355	0.292484	0.750635
aACC: Accuracy. bF1: F1-measure. cBA: Balanced accuracy. dSE:Sensitivity. eSP:Specificity. fMCC:Matthews correlation coefficient. gAUC:The area under receiver operating characteristic.

## Sheet: Table S8
Table S8. AUC results for Multi-task models.
Datasets	Based on DNN::Morgan	Based on graph::GCN	Based on graph::Attentive FP
Bcap37	0.508089	0.615789	0.570963
BT-20	0.413608	0.464013	0.51957
BT-474	0.492779	0.579414	0.38511
BT-549	0.546099	0.502352	0.43206
HS-578T	0.529835	0.512373	0.541363
MCF-7	0.519187	0.536434	0.471845
MDA-MB-231	0.460043	0.552767	0.4404
MDA-MB-361	0.359062	0.599693	0.653671
MDA-MB-435	0.581385	0.482551	0.5553
MDA-MB-453	0.408192	0.620056	0.425284
MDA-MB-468	0.494632	0.428775	0.535796
SK-BR-3	0.503163	0.410096	0.363039
T-47D	0.564639	0.562911	0.447383

## Sheet: Table S9
Table S9. The optimal in silico predictive model for each breast cell line.
Cell lines	The optional model	Training set								Validation set								Test set
		ACCa	F1b	BAc	SEd	SPe	MCCf	AUCg		ACC	F1	BA	SE	SP	MCC	AUC		ACC	F1	BA	SE	SP	MCC	AUC
Bcap37	KNN::AtomPairs	0.995455	0.994286	0.994318	0.988636	1	0.990557	0.999957		0.75	0.695652	0.745989	0.727273	0.764706	0.48553	0.836898		0.851852	0.8	0.832386	0.727273	0.9375	0.692902	0.869318
BT-20	XGBoost::MACCS	0.982906	0.985507	0.980886	0.992701	0.969072	0.964827	0.998645		0.862069	0.882353	0.857843	0.882353	0.833333	0.715686	0.897059		0.827586	0.857143	0.816176	0.882353	0.75	0.641863	0.833333
BT-474	RF::MACCS	0.996918	0.998047	0.995374	0.998047	0.992701	0.990748	0.999693		0.901235	0.940299	0.786305	0.984375	0.588235	0.680657	0.949449		0.876543	0.923077	0.792279	0.9375	0.647059	0.612809	0.899816
BT-549	SVM::MACCS	0.862579	0.903846	0.811632	0.95768	0.665584	0.678836	0.945981		0.762712	0.840909	0.673026	0.925	0.421053	0.415176	0.762007		0.79661	0.857143	0.739474	0.9	0.578947	0.513952	0.688816
HBL-100	RF::Morgan	0.996047	0.99661	0.995283	1	0.990566	0.991904	0.999968		0.78125	0.820513	0.765873	0.888889	0.642857	0.555391	0.857143		0.83871	0.871795	0.818376	0.944444	0.692308	0.672154	0.82265
HS-578T	RF::MACCS	0.970667	0.979592	0.967854	0.97417	0.961538	0.927646	0.996381		0.787234	0.852941	0.734163	0.852941	0.615385	0.468326	0.813348		0.893617	0.927536	0.855204	0.941176	0.769231	0.728776	0.819005
MCF-7	SVM::Morgan	0.979746	0.981767	0.979449	0.982143	0.976755	0.95899	0.996163		0.810075	0.830601	0.806521	0.838749	0.774292	0.614686	0.876367		0.810415	0.831059	0.806751	0.839975	0.773527	0.615319	0.871811
MDA-MB-231	RF::Morgan	0.99509	0.996146	0.994692	0.996146	0.993239	0.989385	0.999826		0.835714	0.876011	0.807399	0.910364	0.704433	0.637624	0.893852		0.836607	0.875932	0.810755	0.904762	0.716749	0.640208	0.904382
MDA-MB-361	RF::MACCS	0.993197	0.994819	0.992459	0.994819	0.990099	0.984918	0.999179		0.783784	0.846154	0.727564	0.916667	0.538462	0.50642	0.932692		0.916667	0.938776	0.895833	0.958333	0.833333	0.810163	0.993056
MDA-MB-435	RF::AtomPairs	0.996287	0.997615	0.996278	0.996294	0.996262	0.98926	0.99996		0.831683	0.898608	0.672843	0.957627	0.38806	0.443373	0.897135		0.848185	0.907631	0.710157	0.957627	0.462687	0.509946	0.870067
MDA-MB-453	RF::AtomPairs	0.994318	0.994475	0.994314	0.994475	0.994152	0.988627	0.999935		0.863636	0.857143	0.863636	0.818182	0.909091	0.730297	0.927686		0.840909	0.844444	0.840909	0.863636	0.818182	0.682524	0.88843
MDA-MB-468	XGBoost::MACCS	0.976715	0.984855	0.964193	0.987685	0.940701	0.934588	0.996978		0.874372	0.921136	0.778135	0.960526	0.595745	0.627734	0.901316		0.89899	0.936709	0.812929	0.973684	0.652174	0.700834	0.909468
SK-BR-3	DNN::AtomPairs	0.94818	0.966667	0.895782	1	0.791563	0.86052	0.99449		0.852217	0.908537	0.725426	0.980263	0.470588	0.57584	0.895769		0.841584	0.900621	0.726974	0.953947	0.5	0.536553	0.859868
T-47D	RF::Morgan	0.997608	0.998294	0.997145	0.998294	0.995995	0.994289	0.999986		0.789809	0.860169	0.700725	0.922727	0.478723	0.461861	0.861944		0.840256	0.892241	0.77153	0.940909	0.602151	0.598661	0.884971
aACC: Accuracy. bF1: F1-measure. cBA: Balanced accuracy. dSE:Sensitivity. eSP:Specificity. fMCC:Matthews correlation coefficient. gAUC:The area under receiver operating characteristic.

## Sheet: Table S10
Table S10. The performance results of voting models based on Morgan fingerprints.
Methods	Cell lines	Training set								Validation set								Test set
		ACCa	F1b	BAc	SEd	SPe	MCCf	AUCg		ACC	F1	BA	SE	SP	MCC	AUC		ACC	F1	BA	SE	SP	MCC	AUC
RF+SVM	Bcap37	0.963636	0.953488	0.958333	0.931818	0.984848	0.924338	0.995739		0.785714	0.7	0.759358	0.636364	0.882353	0.542441	0.802139		0.740741	0.666667	0.724432	0.636364	0.8125	0.456716	0.738636
	BT-20	0.961538	0.967273	0.959628	0.970803	0.948454	0.920678	0.998194		0.793103	0.8125	0.79902	0.764706	0.833333	0.589434	0.892157		0.724138	0.777778	0.703431	0.823529	0.583333	0.421586	0.843137
	BT-474	0.975347	0.984526	0.949625	0.994141	0.905109	0.924993	0.998688		0.876543	0.924242	0.77068	0.953125	0.588235	0.600585	0.910846		0.802469	0.880597	0.637408	0.921875	0.352941	0.326672	0.86489
	BT-549	0.976744	0.982893	0.969324	0.990596	0.948052	0.946875	0.998575		0.830508	0.883721	0.764474	0.95	0.578947	0.596305	0.872697		0.762712	0.835294	0.69375	0.8875	0.5	0.425606	0.707895
	HBL-100	0.968379	0.972603	0.968842	0.965986	0.971698	0.935346	0.997786		0.75	0.8	0.730159	0.888889	0.571429	0.492659	0.833333		0.741935	0.789474	0.724359	0.833333	0.615385	0.462775	0.782051
	HS-578T	0.965333	0.976577	0.9375	1	0.875	0.913754	0.999645		0.808511	0.88	0.677602	0.970588	0.384615	0.476125	0.81448		0.829787	0.891892	0.716063	0.970588	0.461538	0.542929	0.78733
	MCF-7	0.954132	0.958839	0.953119	0.962293	0.943945	0.907078	0.994622		0.808373	0.828719	0.805064	0.835071	0.775057	0.61138	0.884467		0.804289	0.823131	0.802297	0.820356	0.784239	0.604107	0.883935
	MDA-MB-231	0.960277	0.969065	0.954018	0.976875	0.931162	0.913816	0.995727		0.825	0.867209	0.797933	0.896359	0.699507	0.614245	0.889987		0.841071	0.878249	0.819038	0.89916	0.738916	0.651272	0.904482
	MDA-MB-361	0.972789	0.979058	0.974555	0.968912	0.980198	0.940655	0.998589		0.864865	0.90566	0.807692	1	0.615385	0.713641	0.971154		0.888889	0.916667	0.875	0.916667	0.833333	0.75	0.965278
	MDA-MB-435	0.957921	0.973534	0.913381	0.993118	0.833645	0.875158	0.996996		0.834983	0.901961	0.65893	0.974576	0.343284	0.448389	0.902542		0.834983	0.900794	0.674962	0.961864	0.38806	0.454324	0.869877
	MDA-MB-453	0.982955	0.98324	0.983264	0.972376	0.994152	0.966153	0.998901		0.840909	0.829268	0.840909	0.772727	0.909091	0.688247	0.921488		0.704545	0.697674	0.704545	0.681818	0.727273	0.409514	0.855372
	MDA-MB-468	0.965387	0.977724	0.936185	0.990969	0.881402	0.90183	0.998098		0.879397	0.925466	0.766727	0.980263	0.553191	0.642162	0.906495		0.858586	0.9125	0.741133	0.960526	0.521739	0.56803	0.928204
	SK-BR-3	0.952498	0.969039	0.915259	0.989327	0.841191	0.870609	0.996109		0.837438	0.897833	0.722072	0.953947	0.490196	0.528636	0.878483		0.831683	0.890323	0.753947	0.907895	0.6	0.531038	0.864868
	T-47D	0.967305	0.976901	0.954843	0.985787	0.923899	0.921421	0.997671		0.802548	0.869748	0.709816	0.940909	0.478723	0.495234	0.86146		0.821086	0.879828	0.745479	0.931818	0.55914	0.547006	0.888759
RF+XGBoost	Bcap37	0.990909	0.988636	0.99053	0.988636	0.992424	0.981061	0.999785		0.75	0.666667	0.729947	0.636364	0.823529	0.46875	0.807487		0.740741	0.695652	0.738636	0.727273	0.75	0.47194	0.744318
	BT-20	1	1	1	1	1	1	1		0.793103	0.823529	0.786765	0.823529	0.75	0.573529	0.897059		0.758621	0.8	0.745098	0.823529	0.666667	0.497568	0.833333
	BT-474	1	1	1	1	1	1	1		0.888889	0.931298	0.800092	0.953125	0.647059	0.646394	0.917279		0.790123	0.87218	0.629596	0.90625	0.352941	0.297112	0.840074
	BT-549	0.988372	0.9914	0.985502	0.99373	0.977273	0.973481	0.999608		0.847458	0.895349	0.783882	0.9625	0.605263	0.640064	0.857237		0.720339	0.804734	0.648684	0.85	0.447368	0.322729	0.678947
	HBL-100	0.980237	0.982699	0.982993	0.965986	1	0.960455	0.999326		0.71875	0.769231	0.702381	0.833333	0.571429	0.42276	0.837302		0.83871	0.864865	0.82906	0.888889	0.769231	0.666723	0.82265
	HS-578T	0.968	0.978339	0.942308	1	0.884615	0.920383	0.999929		0.808511	0.88	0.677602	0.970588	0.384615	0.476125	0.769231		0.829787	0.891892	0.716063	0.970588	0.461538	0.542929	0.794118
	MCF-7	0.985788	0.98721	0.985528	0.987891	0.983164	0.971223	0.999035		0.810075	0.830498	0.806597	0.838136	0.775057	0.614727	0.886251		0.804969	0.825465	0.80177	0.830779	0.772762	0.604569	0.885183
	MDA-MB-231	0.992636	0.994225	0.991642	0.99527	0.988015	0.984069	0.999598		0.829464	0.868729	0.808341	0.885154	0.731527	0.626533	0.894792		0.833929	0.872951	0.810779	0.894958	0.726601	0.635277	0.903858
	MDA-MB-361	0.989796	0.992208	0.989868	0.989637	0.990099	0.977457	0.99982		0.837838	0.884615	0.786859	0.958333	0.615385	0.638374	0.971154		0.916667	0.93617	0.916667	0.916667	0.916667	0.817861	0.979167
	MDA-MB-435	0.989274	0.993143	0.97972	0.996824	0.962617	0.968663	0.999194		0.841584	0.904762	0.684543	0.966102	0.402985	0.479204	0.910954		0.831683	0.897796	0.683531	0.949153	0.41791	0.450014	0.869118
	MDA-MB-453	0.991477	0.99169	0.991551	0.98895	0.994152	0.982959	0.999871		0.75	0.744186	0.75	0.727273	0.772727	0.500517	0.892562		0.772727	0.75	0.772727	0.681818	0.863636	0.5547	0.826446
	MDA-MB-468	0.986784	0.991425	0.975447	0.996716	0.954178	0.96288	0.999589		0.879397	0.925	0.774076	0.973684	0.574468	0.642002	0.908175		0.863636	0.915361	0.752002	0.960526	0.543478	0.585728	0.925343
	SK-BR-3	0.981493	0.987805	0.96527	0.997537	0.933002	0.950234	0.998967		0.827586	0.890966	0.715493	0.940789	0.490196	0.500595	0.874097		0.816832	0.881789	0.723947	0.907895	0.54	0.480593	0.859934
	T-47D	0.986443	0.99039	0.979986	0.99602	0.963952	0.967567	0.999542		0.786624	0.858947	0.69236	0.927273	0.457447	0.451049	0.863491		0.805112	0.871036	0.715494	0.936364	0.494624	0.500359	0.871359
SVM+XGBoost	Bcap37	0.931818	0.91018	0.920455	0.863636	0.977273	0.858725	0.990315		0.75	0.666667	0.729947	0.636364	0.823529	0.46875	0.786096		0.703704	0.636364	0.693182	0.636364	0.75	0.386364	0.721591
	BT-20	0.935897	0.944649	0.936225	0.934307	0.938144	0.86883	0.989841		0.827586	0.848485	0.828431	0.823529	0.833333	0.650516	0.897059		0.689655	0.756757	0.661765	0.823529	0.5	0.344423	0.803922
	BT-474	0.975347	0.984496	0.952298	0.992188	0.912409	0.925025	0.998204		0.901235	0.938462	0.829504	0.953125	0.705882	0.690855	0.914522		0.82716	0.890625	0.73943	0.890625	0.588235	0.47886	0.859375
	BT-549	0.947146	0.961538	0.929747	0.979624	0.87987	0.878699	0.990077		0.855932	0.900585	0.797039	0.9625	0.631579	0.660813	0.83125		0.70339	0.787879	0.643092	0.8125	0.473684	0.297931	0.682566
	HBL-100	0.944664	0.951724	0.945803	0.938776	0.95283	0.887401	0.989443		0.71875	0.769231	0.702381	0.833333	0.571429	0.42276	0.825397		0.806452	0.85	0.779915	0.944444	0.615385	0.608598	0.803419
	HS-578T	0.909333	0.940559	0.842464	0.99262	0.692308	0.770454	0.981301		0.808511	0.88	0.677602	0.970588	0.384615	0.476125	0.748869		0.808511	0.88	0.677602	0.970588	0.384615	0.476125	0.825792
	MCF-7	0.91822	0.926332	0.91724	0.926119	0.90836	0.834432	0.98055		0.802587	0.822955	0.799624	0.826487	0.772762	0.599915	0.879584		0.804629	0.823818	0.802376	0.822808	0.781943	0.60457	0.880256
	MDA-MB-231	0.946329	0.958236	0.938642	0.966713	0.910572	0.883444	0.990357		0.81875	0.861244	0.794625	0.882353	0.706897	0.601843	0.889587		0.825893	0.865979	0.804477	0.882353	0.726601	0.618683	0.899929
	MDA-MB-361	0.972789	0.979058	0.974555	0.968912	0.980198	0.940655	0.99546		0.837838	0.884615	0.786859	0.958333	0.615385	0.638374	0.971154		0.888889	0.916667	0.875	0.916667	0.833333	0.75	0.979167
	MDA-MB-435	0.926155	0.954185	0.849458	0.986765	0.71215	0.776236	0.989353		0.828383	0.897638	0.654693	0.966102	0.343284	0.42367	0.909436		0.838284	0.902196	0.687769	0.957627	0.41791	0.470578	0.869561
	MDA-MB-453	0.980114	0.980501	0.98034	0.972376	0.988304	0.960354	0.998288		0.75	0.744186	0.75	0.727273	0.772727	0.500517	0.911157		0.75	0.731707	0.75	0.681818	0.818182	0.504715	0.836777
	MDA-MB-468	0.949025	0.967457	0.903956	0.988506	0.819407	0.854257	0.99272		0.884422	0.928349	0.777366	0.980263	0.574468	0.65849	0.890398		0.863636	0.915361	0.752002	0.960526	0.543478	0.585728	0.908467
	SK-BR-3	0.908698	0.941548	0.837962	0.978654	0.69727	0.745602	0.978764		0.837438	0.897833	0.722072	0.953947	0.490196	0.528636	0.876032		0.826733	0.888889	0.730526	0.921053	0.54	0.504117	0.868421
	T-47D	0.929027	0.950638	0.898424	0.974417	0.82243	0.82778	0.986195		0.802548	0.869198	0.712863	0.936364	0.489362	0.495921	0.865909		0.801917	0.866953	0.722532	0.918182	0.526882	0.495872	0.865054
RF+SVM+XGBoost	Bcap37	0.963636	0.953488	0.958333	0.931818	0.984848	0.924338	0.995739		0.785714	0.7	0.759358	0.636364	0.882353	0.542441	0.802139		0.740741	0.666667	0.724432	0.636364	0.8125	0.456716	0.738636
	BT-20	0.961538	0.967273	0.959628	0.970803	0.948454	0.920678	0.998194		0.793103	0.8125	0.79902	0.764706	0.833333	0.589434	0.892157		0.724138	0.777778	0.703431	0.823529	0.583333	0.421586	0.843137
	BT-474	0.975347	0.984526	0.949625	0.994141	0.905109	0.924993	0.998688		0.876543	0.924242	0.77068	0.953125	0.588235	0.600585	0.910846		0.802469	0.880597	0.637408	0.921875	0.352941	0.326672	0.86489
	BT-549	0.976744	0.982893	0.969324	0.990596	0.948052	0.946875	0.998575		0.830508	0.883721	0.764474	0.95	0.578947	0.596305	0.872697		0.762712	0.835294	0.69375	0.8875	0.5	0.425606	0.707895
	HBL-100	0.968379	0.972603	0.968842	0.965986	0.971698	0.935346	0.997786		0.75	0.8	0.730159	0.888889	0.571429	0.492659	0.833333		0.741935	0.789474	0.724359	0.833333	0.615385	0.462775	0.782051
	HS-578T	0.965333	0.976577	0.9375	1	0.875	0.913754	0.999645		0.808511	0.88	0.677602	0.970588	0.384615	0.476125	0.81448		0.829787	0.891892	0.716063	0.970588	0.461538	0.542929	0.78733
	MCF-7	0.954132	0.958839	0.953119	0.962293	0.943945	0.907078	0.994622		0.808373	0.828719	0.805064	0.835071	0.775057	0.61138	0.884467		0.804289	0.823131	0.802297	0.820356	0.784239	0.604107	0.883935
	MDA-MB-231	0.960277	0.969065	0.954018	0.976875	0.931162	0.913816	0.995727		0.825	0.867209	0.797933	0.896359	0.699507	0.614245	0.889987		0.841071	0.878249	0.819038	0.89916	0.738916	0.651272	0.904482
	MDA-MB-361	0.972789	0.979058	0.974555	0.968912	0.980198	0.940655	0.998589		0.864865	0.90566	0.807692	1	0.615385	0.713641	0.971154		0.888889	0.916667	0.875	0.916667	0.833333	0.75	0.965278
	MDA-MB-435	0.957921	0.973534	0.913381	0.993118	0.833645	0.875158	0.996996		0.834983	0.901961	0.65893	0.974576	0.343284	0.448389	0.902542		0.834983	0.900794	0.674962	0.961864	0.38806	0.454324	0.869877
	MDA-MB-453	0.982955	0.98324	0.983264	0.972376	0.994152	0.966153	0.998901		0.840909	0.829268	0.840909	0.772727	0.909091	0.688247	0.921488		0.704545	0.697674	0.704545	0.681818	0.727273	0.409514	0.855372
	MDA-MB-468	0.965387	0.977724	0.936185	0.990969	0.881402	0.90183	0.998098		0.879397	0.925466	0.766727	0.980263	0.553191	0.642162	0.906495		0.858586	0.9125	0.741133	0.960526	0.521739	0.56803	0.928204
	SK-BR-3	0.952498	0.969039	0.915259	0.989327	0.841191	0.870609	0.996109		0.837438	0.897833	0.722072	0.953947	0.490196	0.528636	0.878483		0.831683	0.890323	0.753947	0.907895	0.6	0.531038	0.864868
	T-47D	0.967305	0.976901	0.954843	0.985787	0.923899	0.921421	0.997671		0.802548	0.869748	0.709816	0.940909	0.478723	0.495234	0.86146		0.821086	0.879828	0.745479	0.931818	0.55914	0.547006	0.888759
aACC: Accuracy. bF1: F1-measure. cBA: Balanced accuracy. dSE:Sensitivity. eSP:Specificity. fMCC:Matthews correlation coefficient. gAUC:The area under receiver operating characteristic.

[truncated: 2 more sheets: Table S11, Table S12]
